# Supplementary material for: Machine Learning Application to Brain Diseases Detection
Source: Preprints.org preprint supplement (doi:10.20944/preprints202311.1127.v1), 2023-11-17
Supplement: Supplementary file 1 [file supplementary]

```
In[1]:= mainDir = SetDirectory[NotebookDirectory[]];
```

```
In[2]:= fig = Plot[Clip[(x + 0.1)^2], {x, 0, 1}, AxesOrigin → {-0.2, -0.2},  
  Ticks → {{0, 1}, {0, 1}}, AspectRatio → Automatic,  
  TicksStyle → Directive[Black, 18], Epilog → {PointSize[0.04],  
    Text[Style["in", Large], {0.5, 0}], Text[Style["out", Large], {0.8, 0.5}]},  
  PlotStyle → {Thick, Blue}, AxesStyle → {Thick, Thick}]
```

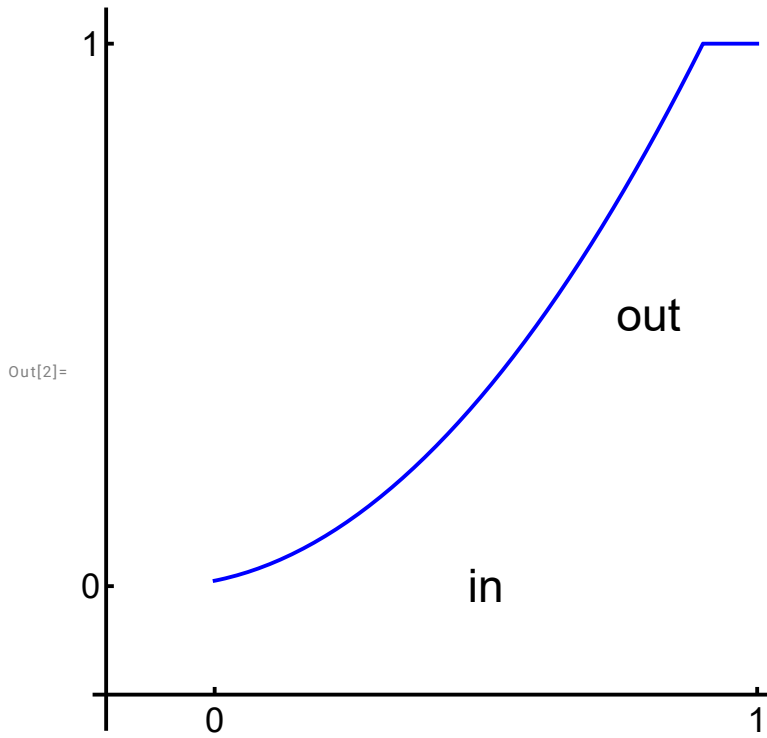

```
In[3]:= (* Export["D2x008.tif",fig,ImageResolution→300]; *)
```
