# Supplementary material for: Machine Learning Application to Brain Diseases Detection
Source: Preprints.org preprint supplement (doi:10.20944/preprints202311.1127.v1), 2023-11-17
Supplement: Supplementary file 2 [file supplementary]

```
In[1]:= mainDir = SetDirectory[NotebookDirectory[]];
```

```
In[2]:= fileNames = StringTake[FileNames["*.png"], {1, -5}]
```

```
Out[2]= {01-IMG-0007-00026, 02-IMG-0002-00001, 03-IMG-0001-00001}
```

```
In[3]:= i = 2;
```

```
file = fileNames[[i]] <> ".png";
```

```
dataImg = Import[file, "Data"];
```

```
In[6]:= << swKnowledgeSVMi10fast5`
```

```
img1 = manipulateXYZ5
```

```
img3 = ImageAdjust[Image[dataImg]]
```

```
Out[7]=
```

X

1

▼

02-IMG-0002-00001.png

```
Out[8]=
```

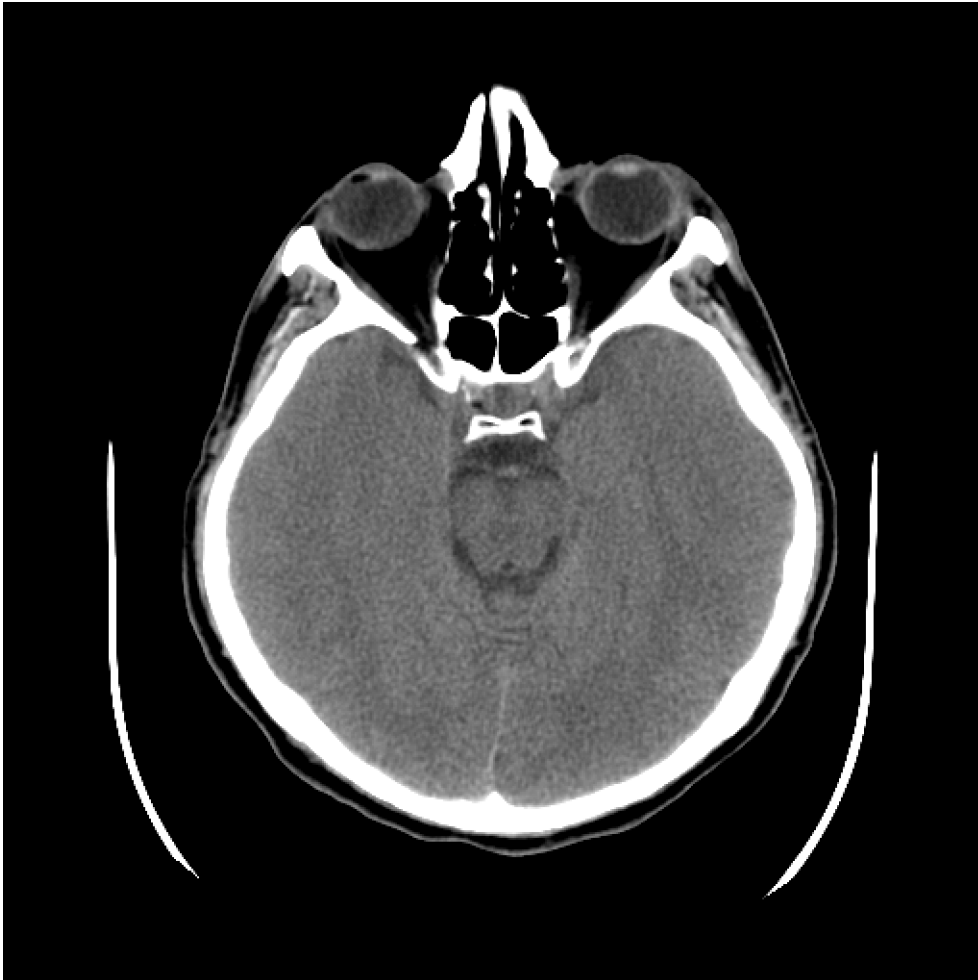

In[9]:= **img2 =**

Out[9]=

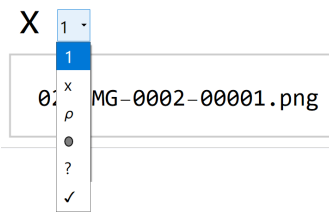

In[10]:= (  
 Export["D2fig009a.tif",img1,ImageResolution→300];  
 Export["D2fig009b.tif",img2,ImageResolution→300];  
 Export["D2fig009c.tif",img3,ImageResolution→300];  
 \*)
