# Supplementary material for: Machine Learning Application to Brain Diseases Detection
Source: Preprints.org preprint supplement (doi:10.20944/preprints202311.1127.v1), 2023-11-17
Supplement: Supplementary file 3 [file supplementary]

```

In[ ]:= mainDir = SetDirectory[NotebookDirectory[]];
Clear[imgB0, imgE0, imgG0, imgH0, imgI0, imgM0, imgN0, imgP0, imgEBTNSV, imgTxt]

In[ ]:= imgB0 = {Import["Samples/imgB01.png"], Import["Samples/imgB02.png"],
  Import["Samples/imgB03.png"], Import["Samples/imgB04.png"],
  Import["Samples/imgB05.png"], Import["Samples/imgB06.png"],
  Import["Samples/imgB07.png"], Import["Samples/imgB08.png"],
  Import["Samples/imgB09.png"], Import["Samples/imgB10.png"]};
imgE0 = {Import["Samples/imgE01.png"],
  Import["Samples/imgE02.png"], Import["Samples/imgE03.png"],
  Import["Samples/imgE04.png"], Import["Samples/imgE05.png"],
  Import["Samples/imgE06.png"], Import["Samples/imgE07.png"]};
imgG0 = {Import["Samples/imgG01.png"],
  Import["Samples/imgG02.png"], Import["Samples/imgG03.png"],
  Import["Samples/imgG04.png"], Import["Samples/imgG05.png"],
  Import["Samples/imgG06.png"], Import["Samples/imgG07.png"],
  Import["Samples/imgG08.png"], Import["Samples/imgG09.png"]};
imgH0 = {Import["Samples/imgH01.png"], Import["Samples/imgH02.png"],
  Import["Samples/imgH03.png"], Import["Samples/imgH04.png"]};
imgI0 = {Import["Samples/imgI01.png"],
  Import["Samples/imgI02.png"], Import["Samples/imgI03.png"],
  Import["Samples/imgI04.png"], Import["Samples/imgI05.png"],
  Import["Samples/imgI06.png"], Import["Samples/imgI07.png"],
  Import["Samples/imgI08.png"], Import["Samples/imgI09.png"]};
imgM0 = {Import["Samples/imgM01.png"], Import["Samples/imgM02.png"],
  Import["Samples/imgM03.png"], Import["Samples/imgM04.png"],
  Import["Samples/imgM05.png"], Import["Samples/imgM06.png"],
  Import["Samples/imgM07.png"], Import["Samples/imgM08.png"]};
imgN0 = {Import["Samples/imgN01.png"],
  Import["Samples/imgN02.png"], Import["Samples/imgN03.png"],
  Import["Samples/imgN04.png"], Import["Samples/imgN05.png"]};
imgP0 = {Import["Samples/imgP01.png"], Import["Samples/imgP02.png"],
  Import["Samples/imgP03.png"], Import["Samples/imgP04.png"]};
imgR0 = {Import["Samples/imgR01.png"], Import["Samples/imgR02.png"],
  Import["Samples/imgR03.png"], Import["Samples/imgR04.png"]};

In[ ]:= {Dimensions[imgB0], Dimensions[imgE0],
  Dimensions[imgG0], Dimensions[imgH0], Dimensions[imgI0],
  Dimensions[imgM0], Dimensions[imgN0], Dimensions[imgP0]} // Flatten

Out[ ]:= {10, 7, 9, 4, 9, 8, 5, 4}

```

```
In[*]:= imgEBTNSV = Classify[
  {imgB0[[1]] → "Bones", imgB0[[2]] → "Bones", imgB0[[3]] → "Bones",
   imgB0[[4]] → "Bones", imgB0[[5]] → "Bones", imgB0[[6]] → "Bones", imgB0[[7]] → "Bones",
   imgB0[[8]] → "Bones", imgB0[[9]] → "Bones", imgB0[[10]] → "Bones",
   imgE0[[1]] → "Empty", imgE0[[2]] → "Empty", imgE0[[3]] → "Empty",
   imgE0[[4]] → "Empty", imgE0[[5]] → "Empty", imgE0[[6]] → "Empty", imgE0[[7]] → "Empty",
   imgG0[[1]] → "GlioblastomaGBM",
   imgG0[[2]] → "GlioblastomaGBM", imgG0[[3]] → "GlioblastomaGBM",
   imgG0[[4]] → "GlioblastomaGBM", imgG0[[5]] → "GlioblastomaGBM",
   imgG0[[6]] → "GlioblastomaGBM", imgG0[[7]] → "GlioblastomaGBM",
   imgG0[[8]] → "GlioblastomaGBM", imgG0[[9]] → "GlioblastomaGBM",
   imgH0[[1]] → "Stroke", imgH0[[2]] → "Stroke", imgH0[[3]] → "Stroke", imgH0[[4]] → "Stroke",
   imgI0[[1]] → "Irrelevant", imgI0[[2]] → "Irrelevant", imgI0[[3]] → "Irrelevant",
   imgI0[[4]] → "Irrelevant", imgI0[[5]] → "Irrelevant", imgI0[[6]] → "Irrelevant",
   imgI0[[7]] → "Irrelevant", imgI0[[8]] → "Irrelevant", imgI0[[9]] → "Irrelevant",
   imgM0[[1]] → "Metastases", imgM0[[2]] → "Metastases",
   imgM0[[3]] → "Metastases", imgM0[[4]] → "Metastases", imgM0[[5]] → "Metastases",
   imgM0[[6]] → "Metastases", imgM0[[7]] → "Metastases", imgM0[[8]] → "Metastases",
   imgN0[[1]] → "Normal", imgN0[[2]] → "Normal",
   imgN0[[3]] → "Normal", imgN0[[4]] → "Normal", imgN0[[5]] → "Normal",
   imgP0[[1]] → "PleomorphicPXA", imgP0[[2]] → "PleomorphicPXA",
   imgP0[[3]] → "PleomorphicPXA", imgP0[[4]] → "PleomorphicPXA",
   imgR0[[1]] → "Hemorrhage", imgR0[[2]] → "Hemorrhage",
   imgR0[[3]] → "Hemorrhage", imgR0[[4]] → "Hemorrhage"}]
```

Out[\*]=

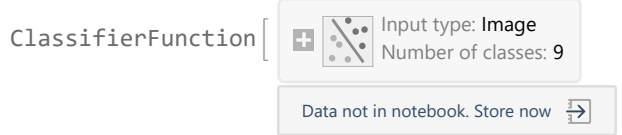

```
In[*]:= StringTake[FileNames["" <> "*.png"], {1, -5}]
dims = Dimensions[StringTake[FileNames["" <> "*.png"], {1, -5}]] [[1]]
```

Out[\*]=

```
{IMG-0001-00001, IMG-0001-00002, IMG-0001-00003, IMG-0001-00004,
IMG-0001-00005, IMG-0001-00006, IMG-0001-00007, IMG-0001-00008,
IMG-0001-00009, IMG-0001-00010, IMG-0001-00011, IMG-0001-00012,
IMG-0001-00013, IMG-0001-00014, IMG-0001-00015, IMG-0001-00016,
IMG-0001-00017, IMG-0001-00018, IMG-0001-00019, IMG-0001-00020, IMG-0001-00021,
IMG-0001-00022, IMG-0001-00023, IMG-0001-00024, IMG-0001-00025, IMG-0001-00026,
IMG-0001-00027, IMG-0001-00028, IMG-0001-00029, IMG-0001-00030, IMG-0001-00031,
IMG-0001-00032, IMG-0001-00033, IMG-0001-00034, IMG-0001-00035, IMG-0001-00036,
IMG-0001-00037, IMG-0001-00038, IMG-0001-00039, IMG-0002-00001, IMG-0002-00002,
IMG-0002-00003, IMG-0002-00004, IMG-0002-00005, IMG-0002-00006, IMG-0002-00007,
IMG-0002-00008, IMG-0002-00009, IMG-0002-00010, IMG-0002-00011, IMG-0002-00012,
IMG-0002-00013, IMG-0002-00014, IMG-0002-00015, IMG-0002-00016, IMG-0002-00017,
IMG-0002-00018, IMG-0002-00019, IMG-0002-00020, IMG-0002-00021, IMG-0002-00022,
IMG-0002-00023, IMG-0002-00024, IMG-0002-00025, IMG-0002-00026, IMG-0002-00027,
IMG-0002-00028, IMG-0002-00029, IMG-0002-00030, IMG-0002-00031, IMG-0002-00032,
IMG-0002-00033, IMG-0002-00034, IMG-0002-00035, IMG-0002-00036, IMG-0002-00037,
IMG-0002-00038, IMG-0002-00039, IMG-0003-00001, IMG-0003-00002, IMG-0003-00003,
IMG-0003-00004, IMG-0003-00005, IMG-0003-00006, IMG-0003-00007, IMG-0003-00008,
```

[illegible]

[illegible]

[illegible]

[illegible]

[illegible]

[illegible]



[illegible]

[illegible]

```

In[ ]:= t1 = TimeUsed[];
StringTake[FileNames["" <> "*.png"], {1, -5}];
dims = Dimensions[StringTake[FileNames["" <> "*.png"], {1, -5}]] [[1]];
dimsEnd = dims - 3;
dimsEnd = 1;
{dims, dimsEnd};
Do[
  fileNamesInd = StringTake[FileNames["" <> "*.png"], {1, -5}][[ind]];
  imgTxt = imgEBTNSV[ImageAdjust[Image[Import[fileNamesInd <> ".png", "Data"]]]];
  StringTake[FileNames["" <> "*.png"], {1, -5}];
  If[imgTxt == "Bones", CopyFile[fileNamesInd <> ".png",
    FileNameJoin[{"Bones/" <> fileNamesInd <> ".png"}]]];
  If[imgTxt == "Bones", DeleteFile[fileNamesInd <> ".png"]];
  If[imgTxt == "Empty", CopyFile[fileNamesInd <> ".png",
    FileNameJoin[{"Empty/" <> fileNamesInd <> ".png"}]]];
  If[imgTxt == "Empty", DeleteFile[fileNamesInd <> ".png"]];
  If[imgTxt == "GlioblastomaGBM", CopyFile[fileNamesInd <> ".png",
    FileNameJoin[{"GlioblastomaGBM/" <> fileNamesInd <> ".png"}]]];
  If[imgTxt == "GlioblastomaGBM", DeleteFile[fileNamesInd <> ".png"]];
  If[imgTxt == "Hemorrhage", CopyFile[fileNamesInd <> ".png",
    FileNameJoin[{"Hemorrhage/" <> fileNamesInd <> ".png"}]]];
  If[imgTxt == "Hemorrhage", DeleteFile[fileNamesInd <> ".png"]];
  If[imgTxt == "Stroke", CopyFile[fileNamesInd <> ".png",
    FileNameJoin[{"Stroke/" <> fileNamesInd <> ".png"}]]];
  If[imgTxt == "Stroke", DeleteFile[fileNamesInd <> ".png"]];
  If[imgTxt == "Irrelevant", CopyFile[fileNamesInd <> ".png",
    FileNameJoin[{"Irrelevant/" <> fileNamesInd <> ".png"}]]];
  If[imgTxt == "Irrelevant", DeleteFile[fileNamesInd <> ".png"]];
  If[imgTxt == "Metastases", CopyFile[fileNamesInd <> ".png",
    FileNameJoin[{"Metastases/" <> fileNamesInd <> ".png"}]]];
  If[imgTxt == "Metastases", DeleteFile[fileNamesInd <> ".png"]];
  If[imgTxt == "Normal", CopyFile[fileNamesInd <> ".png",
    FileNameJoin[{"Normal/" <> fileNamesInd <> ".png"}]]];
  If[imgTxt == "Normal", DeleteFile[fileNamesInd <> ".png"]];
  If[imgTxt == "PleomorphicPXA", CopyFile[fileNamesInd <> ".png",
    FileNameJoin[{"PleomorphicPXA/" <> fileNamesInd <> ".png"}]]];
  If[imgTxt == "PleomorphicPXA", DeleteFile[fileNamesInd <> ".png"]];
  Print["ind = ", ind, " type " <> imgTxt, " fileNamesInd " <> fileNamesInd],
  {ind, dims, dimsEnd, -1}]

ind = 2021 type Empty fileNamesInd IMG-1002-00037
ind = 2020 type Empty fileNamesInd IMG-1002-00036
ind = 2019 type Empty fileNamesInd IMG-1002-00035
ind = 2018 type Empty fileNamesInd IMG-1002-00034
ind = 2017 type Empty fileNamesInd IMG-1002-00033
ind = 2016 type Irrelevant fileNamesInd IMG-1002-00032
ind = 2015 type Irrelevant fileNamesInd IMG-1002-00031
ind = 2014 type Irrelevant fileNamesInd IMG-1002-00030

```

ind = 2013 type Irrelevant fileNamesInd IMG-1002-00029  
ind = 2012 type Bones fileNamesInd IMG-1002-00028  
ind = 2011 type Stroke fileNamesInd IMG-1002-00027  
ind = 2010 type Stroke fileNamesInd IMG-1002-00026  
ind = 2009 type Stroke fileNamesInd IMG-1002-00025  
ind = 2008 type Stroke fileNamesInd IMG-1002-00024  
ind = 2007 type Stroke fileNamesInd IMG-1002-00023  
ind = 2006 type Stroke fileNamesInd IMG-1002-00022  
ind = 2005 type Stroke fileNamesInd IMG-1002-00021  
ind = 2004 type Stroke fileNamesInd IMG-1002-00020  
ind = 2003 type Stroke fileNamesInd IMG-1002-00019  
ind = 2002 type Stroke fileNamesInd IMG-1002-00018  
ind = 2001 type Stroke fileNamesInd IMG-1002-00017  
ind = 2000 type Stroke fileNamesInd IMG-1002-00016  
ind = 1999 type Stroke fileNamesInd IMG-1002-00015  
ind = 1998 type Stroke fileNamesInd IMG-1002-00014  
ind = 1997 type Stroke fileNamesInd IMG-1002-00013  
ind = 1996 type Stroke fileNamesInd IMG-1002-00012  
ind = 1995 type Metastases fileNamesInd IMG-1002-00011  
ind = 1994 type Stroke fileNamesInd IMG-1002-00010  
ind = 1993 type Stroke fileNamesInd IMG-1002-00009  
ind = 1992 type Irrelevant fileNamesInd IMG-1002-00008  
ind = 1991 type Irrelevant fileNamesInd IMG-1002-00007  
ind = 1990 type Irrelevant fileNamesInd IMG-1002-00006  
ind = 1989 type Irrelevant fileNamesInd IMG-1002-00005  
ind = 1988 type Irrelevant fileNamesInd IMG-1002-00004  
ind = 1987 type Irrelevant fileNamesInd IMG-1002-00003  
ind = 1986 type Irrelevant fileNamesInd IMG-1002-00002  
ind = 1985 type Irrelevant fileNamesInd IMG-1002-00001  
ind = 1984 type Empty fileNamesInd IMG-1001-00037  
ind = 1983 type Empty fileNamesInd IMG-1001-00036  
ind = 1982 type Empty fileNamesInd IMG-1001-00035  
ind = 1981 type Empty fileNamesInd IMG-1001-00034  
ind = 1980 type Irrelevant fileNamesInd IMG-1001-00033  
ind = 1979 type Irrelevant fileNamesInd IMG-1001-00032  
ind = 1978 type Irrelevant fileNamesInd IMG-1001-00031  
ind = 1977 type Irrelevant fileNamesInd IMG-1001-00030  
ind = 1976 type Bones fileNamesInd IMG-1001-00029  
ind = 1975 type Bones fileNamesInd IMG-1001-00028

ind = 1974 type Bones fileNamesInd IMG-1001-00027  
ind = 1973 type Bones fileNamesInd IMG-1001-00026  
ind = 1972 type Bones fileNamesInd IMG-1001-00025  
ind = 1971 type Bones fileNamesInd IMG-1001-00024  
ind = 1970 type Bones fileNamesInd IMG-1001-00023  
ind = 1969 type Bones fileNamesInd IMG-1001-00022  
ind = 1968 type Bones fileNamesInd IMG-1001-00021  
ind = 1967 type Bones fileNamesInd IMG-1001-00020  
ind = 1966 type Bones fileNamesInd IMG-1001-00019  
ind = 1965 type Bones fileNamesInd IMG-1001-00018  
ind = 1964 type Bones fileNamesInd IMG-1001-00017  
ind = 1963 type Bones fileNamesInd IMG-1001-00016  
ind = 1962 type Bones fileNamesInd IMG-1001-00015  
ind = 1961 type Bones fileNamesInd IMG-1001-00014  
ind = 1960 type Bones fileNamesInd IMG-1001-00013  
ind = 1959 type Bones fileNamesInd IMG-1001-00012  
ind = 1958 type Bones fileNamesInd IMG-1001-00011  
ind = 1957 type Bones fileNamesInd IMG-1001-00010  
ind = 1956 type Bones fileNamesInd IMG-1001-00009  
ind = 1955 type Bones fileNamesInd IMG-1001-00008  
ind = 1954 type Bones fileNamesInd IMG-1001-00007  
ind = 1953 type Bones fileNamesInd IMG-1001-00006  
ind = 1952 type Bones fileNamesInd IMG-1001-00005  
ind = 1951 type Bones fileNamesInd IMG-1001-00004  
ind = 1950 type Bones fileNamesInd IMG-1001-00003  
ind = 1949 type Bones fileNamesInd IMG-1001-00002  
ind = 1948 type Bones fileNamesInd IMG-1001-00001  
ind = 1947 type Empty fileNamesInd IMG-0994-00047  
ind = 1946 type Empty fileNamesInd IMG-0994-00046  
ind = 1945 type Empty fileNamesInd IMG-0994-00045  
ind = 1944 type Empty fileNamesInd IMG-0994-00044  
ind = 1943 type Irrelevant fileNamesInd IMG-0994-00043  
ind = 1942 type Irrelevant fileNamesInd IMG-0994-00042  
ind = 1941 type Irrelevant fileNamesInd IMG-0994-00041  
ind = 1940 type Bones fileNamesInd IMG-0994-00040  
ind = 1939 type Bones fileNamesInd IMG-0994-00039  
ind = 1938 type Bones fileNamesInd IMG-0994-00038  
ind = 1937 type Bones fileNamesInd IMG-0994-00037  
ind = 1936 type Bones fileNamesInd IMG-0994-00036

```
ind = 1935 type Bones fileNamesInd IMG-0994-00035
ind = 1934 type Bones fileNamesInd IMG-0994-00034
ind = 1933 type Bones fileNamesInd IMG-0994-00033
ind = 1932 type Bones fileNamesInd IMG-0994-00032
ind = 1931 type Bones fileNamesInd IMG-0994-00031
ind = 1930 type Bones fileNamesInd IMG-0994-00030
ind = 1929 type Bones fileNamesInd IMG-0994-00029
ind = 1928 type Bones fileNamesInd IMG-0994-00028
ind = 1927 type Bones fileNamesInd IMG-0994-00027
ind = 1926 type Bones fileNamesInd IMG-0994-00026
ind = 1925 type Bones fileNamesInd IMG-0994-00025
ind = 1924 type Bones fileNamesInd IMG-0994-00024
ind = 1923 type Bones fileNamesInd IMG-0994-00023
ind = 1922 type Bones fileNamesInd IMG-0994-00022
ind = 1921 type Irrelevant fileNamesInd IMG-0994-00021
ind = 1920 type Irrelevant fileNamesInd IMG-0994-00020
ind = 1919 type Irrelevant fileNamesInd IMG-0994-00019
ind = 1918 type Irrelevant fileNamesInd IMG-0994-00018
ind = 1917 type Irrelevant fileNamesInd IMG-0994-00017
ind = 1916 type Irrelevant fileNamesInd IMG-0994-00016
ind = 1915 type Irrelevant fileNamesInd IMG-0994-00015
ind = 1914 type Irrelevant fileNamesInd IMG-0994-00014
ind = 1913 type Irrelevant fileNamesInd IMG-0994-00013
ind = 1912 type Irrelevant fileNamesInd IMG-0994-00012
ind = 1911 type Irrelevant fileNamesInd IMG-0994-00011
ind = 1910 type Irrelevant fileNamesInd IMG-0994-00010
ind = 1909 type Irrelevant fileNamesInd IMG-0994-00009
ind = 1908 type Empty fileNamesInd IMG-0994-00008
ind = 1907 type Irrelevant fileNamesInd IMG-0994-00007
ind = 1906 type Irrelevant fileNamesInd IMG-0994-00006
ind = 1905 type Irrelevant fileNamesInd IMG-0994-00005
ind = 1904 type Irrelevant fileNamesInd IMG-0994-00004
ind = 1903 type Irrelevant fileNamesInd IMG-0994-00003
ind = 1902 type Empty fileNamesInd IMG-0994-00002
ind = 1901 type Empty fileNamesInd IMG-0994-00001
ind = 1900 type Empty fileNamesInd IMG-0993-00047
ind = 1899 type Empty fileNamesInd IMG-0993-00046
ind = 1898 type Empty fileNamesInd IMG-0993-00045
ind = 1897 type Irrelevant fileNamesInd IMG-0993-00044
```

ind = 1896 type Irrelevant fileNamesInd IMG-0993-00043  
ind = 1895 type Irrelevant fileNamesInd IMG-0993-00042  
ind = 1894 type Irrelevant fileNamesInd IMG-0993-00041  
ind = 1893 type Bones fileNamesInd IMG-0993-00040  
ind = 1892 type Bones fileNamesInd IMG-0993-00039  
ind = 1891 type Bones fileNamesInd IMG-0993-00038  
ind = 1890 type Bones fileNamesInd IMG-0993-00037  
ind = 1889 type Bones fileNamesInd IMG-0993-00036  
ind = 1888 type Bones fileNamesInd IMG-0993-00035  
ind = 1887 type Bones fileNamesInd IMG-0993-00034  
ind = 1886 type Bones fileNamesInd IMG-0993-00033  
ind = 1885 type Bones fileNamesInd IMG-0993-00032  
ind = 1884 type Bones fileNamesInd IMG-0993-00031  
ind = 1883 type Bones fileNamesInd IMG-0993-00030  
ind = 1882 type Bones fileNamesInd IMG-0993-00029  
ind = 1881 type Bones fileNamesInd IMG-0993-00028  
ind = 1880 type Bones fileNamesInd IMG-0993-00027  
ind = 1879 type Bones fileNamesInd IMG-0993-00026  
ind = 1878 type Bones fileNamesInd IMG-0993-00025  
ind = 1877 type Bones fileNamesInd IMG-0993-00024  
ind = 1876 type Bones fileNamesInd IMG-0993-00023  
ind = 1875 type Bones fileNamesInd IMG-0993-00022  
ind = 1874 type Bones fileNamesInd IMG-0993-00021  
ind = 1873 type Bones fileNamesInd IMG-0993-00020  
ind = 1872 type Bones fileNamesInd IMG-0993-00019  
ind = 1871 type Bones fileNamesInd IMG-0993-00018  
ind = 1870 type Bones fileNamesInd IMG-0993-00017  
ind = 1869 type Bones fileNamesInd IMG-0993-00016  
ind = 1868 type Irrelevant fileNamesInd IMG-0993-00015  
ind = 1867 type Irrelevant fileNamesInd IMG-0993-00014  
ind = 1866 type Irrelevant fileNamesInd IMG-0993-00013  
ind = 1865 type Irrelevant fileNamesInd IMG-0993-00012  
ind = 1864 type Irrelevant fileNamesInd IMG-0993-00011  
ind = 1863 type Irrelevant fileNamesInd IMG-0993-00010  
ind = 1862 type Irrelevant fileNamesInd IMG-0993-00009  
ind = 1861 type Irrelevant fileNamesInd IMG-0993-00008  
ind = 1860 type Irrelevant fileNamesInd IMG-0993-00007  
ind = 1859 type Irrelevant fileNamesInd IMG-0993-00006  
ind = 1858 type Bones fileNamesInd IMG-0993-00005

ind = 1857 type Bones fileNamesInd IMG-0993-00004  
ind = 1856 type Bones fileNamesInd IMG-0993-00003  
ind = 1855 type Bones fileNamesInd IMG-0993-00002  
ind = 1854 type Bones fileNamesInd IMG-0993-00001  
ind = 1853 type Empty fileNamesInd IMG-0992-00049  
ind = 1852 type Empty fileNamesInd IMG-0992-00048  
ind = 1851 type Empty fileNamesInd IMG-0992-00047  
ind = 1850 type Empty fileNamesInd IMG-0992-00046  
ind = 1849 type Empty fileNamesInd IMG-0992-00045  
ind = 1848 type Empty fileNamesInd IMG-0992-00044  
ind = 1847 type Empty fileNamesInd IMG-0992-00043  
ind = 1846 type Empty fileNamesInd IMG-0992-00042  
ind = 1845 type Bones fileNamesInd IMG-0992-00041  
ind = 1844 type Bones fileNamesInd IMG-0992-00040  
ind = 1843 type Bones fileNamesInd IMG-0992-00039  
ind = 1842 type Bones fileNamesInd IMG-0992-00038  
ind = 1841 type Bones fileNamesInd IMG-0992-00037  
ind = 1840 type Bones fileNamesInd IMG-0992-00036  
ind = 1839 type Bones fileNamesInd IMG-0992-00035  
ind = 1838 type Bones fileNamesInd IMG-0992-00034  
ind = 1837 type Bones fileNamesInd IMG-0992-00033  
ind = 1836 type Bones fileNamesInd IMG-0992-00032  
ind = 1835 type Bones fileNamesInd IMG-0992-00031  
ind = 1834 type Bones fileNamesInd IMG-0992-00030  
ind = 1833 type Bones fileNamesInd IMG-0992-00029  
ind = 1832 type Bones fileNamesInd IMG-0992-00028  
ind = 1831 type Bones fileNamesInd IMG-0992-00027  
ind = 1830 type Bones fileNamesInd IMG-0992-00026  
ind = 1829 type Bones fileNamesInd IMG-0992-00025  
ind = 1828 type Bones fileNamesInd IMG-0992-00024  
ind = 1827 type Bones fileNamesInd IMG-0992-00023  
ind = 1826 type Bones fileNamesInd IMG-0992-00022  
ind = 1825 type Bones fileNamesInd IMG-0992-00021  
ind = 1824 type Bones fileNamesInd IMG-0992-00020  
ind = 1823 type Bones fileNamesInd IMG-0992-00019  
ind = 1822 type Bones fileNamesInd IMG-0992-00018  
ind = 1821 type Bones fileNamesInd IMG-0992-00017  
ind = 1820 type Bones fileNamesInd IMG-0992-00016  
ind = 1819 type Bones fileNamesInd IMG-0992-00015



ind = 1818 type Bones fileNamesInd IMG-0992-00014  
ind = 1817 type Bones fileNamesInd IMG-0992-00013  
ind = 1816 type Irrelevant fileNamesInd IMG-0992-00012  
ind = 1815 type Irrelevant fileNamesInd IMG-0992-00011  
ind = 1814 type Irrelevant fileNamesInd IMG-0992-00010  
ind = 1813 type Irrelevant fileNamesInd IMG-0992-00009  
ind = 1812 type Empty fileNamesInd IMG-0992-00008  
ind = 1811 type Empty fileNamesInd IMG-0992-00007  
ind = 1810 type Empty fileNamesInd IMG-0992-00006  
ind = 1809 type Empty fileNamesInd IMG-0992-00005  
ind = 1808 type Empty fileNamesInd IMG-0992-00004  
ind = 1807 type Bones fileNamesInd IMG-0992-00003  
ind = 1806 type Bones fileNamesInd IMG-0992-00002  
ind = 1805 type Bones fileNamesInd IMG-0992-00001  
ind = 1804 type Empty fileNamesInd IMG-0991-00049  
ind = 1803 type Empty fileNamesInd IMG-0991-00048  
ind = 1802 type Empty fileNamesInd IMG-0991-00047  
ind = 1801 type Empty fileNamesInd IMG-0991-00046  
ind = 1800 type Empty fileNamesInd IMG-0991-00045  
ind = 1799 type Empty fileNamesInd IMG-0991-00044  
ind = 1798 type Empty fileNamesInd IMG-0991-00043  
ind = 1797 type Empty fileNamesInd IMG-0991-00042  
ind = 1796 type Empty fileNamesInd IMG-0991-00041  
ind = 1795 type Bones fileNamesInd IMG-0991-00040  
ind = 1794 type Bones fileNamesInd IMG-0991-00039  
ind = 1793 type Bones fileNamesInd IMG-0991-00038  
ind = 1792 type Bones fileNamesInd IMG-0991-00037  
ind = 1791 type Bones fileNamesInd IMG-0991-00036  
ind = 1790 type Bones fileNamesInd IMG-0991-00035  
ind = 1789 type Bones fileNamesInd IMG-0991-00034  
ind = 1788 type Bones fileNamesInd IMG-0991-00033  
ind = 1787 type Stroke fileNamesInd IMG-0991-00032  
ind = 1786 type Stroke fileNamesInd IMG-0991-00031  
ind = 1785 type Stroke fileNamesInd IMG-0991-00030  
ind = 1784 type Stroke fileNamesInd IMG-0991-00029  
ind = 1783 type Stroke fileNamesInd IMG-0991-00028  
ind = 1782 type Stroke fileNamesInd IMG-0991-00027  
ind = 1781 type Stroke fileNamesInd IMG-0991-00026  
ind = 1780 type Stroke fileNamesInd IMG-0991-00025

ind = 1779 type Stroke fileNamesInd IMG-0991-00024  
ind = 1778 type Stroke fileNamesInd IMG-0991-00023  
ind = 1777 type Stroke fileNamesInd IMG-0991-00022  
ind = 1776 type Stroke fileNamesInd IMG-0991-00021  
ind = 1775 type Irrelevant fileNamesInd IMG-0991-00020  
ind = 1774 type Irrelevant fileNamesInd IMG-0991-00019  
ind = 1773 type Bones fileNamesInd IMG-0991-00018  
ind = 1772 type Empty fileNamesInd IMG-0991-00017  
ind = 1771 type Empty fileNamesInd IMG-0991-00016  
ind = 1770 type Irrelevant fileNamesInd IMG-0991-00015  
ind = 1769 type Irrelevant fileNamesInd IMG-0991-00014  
ind = 1768 type Irrelevant fileNamesInd IMG-0991-00013  
ind = 1767 type Irrelevant fileNamesInd IMG-0991-00012  
ind = 1766 type Irrelevant fileNamesInd IMG-0991-00011  
ind = 1765 type Empty fileNamesInd IMG-0991-00010  
ind = 1764 type Empty fileNamesInd IMG-0991-00009  
ind = 1763 type Empty fileNamesInd IMG-0991-00008  
ind = 1762 type Empty fileNamesInd IMG-0991-00007  
ind = 1761 type Empty fileNamesInd IMG-0991-00006  
ind = 1760 type Empty fileNamesInd IMG-0991-00005  
ind = 1759 type Empty fileNamesInd IMG-0991-00004  
ind = 1758 type Empty fileNamesInd IMG-0991-00003  
ind = 1757 type Empty fileNamesInd IMG-0991-00002  
ind = 1756 type Empty fileNamesInd IMG-0991-00001  
ind = 1755 type Empty fileNamesInd IMG-0908-00044  
ind = 1754 type Empty fileNamesInd IMG-0908-00043  
ind = 1753 type Empty fileNamesInd IMG-0908-00042  
ind = 1752 type Bones fileNamesInd IMG-0908-00041  
ind = 1751 type Bones fileNamesInd IMG-0908-00040  
ind = 1750 type Bones fileNamesInd IMG-0908-00039  
ind = 1749 type Bones fileNamesInd IMG-0908-00038  
ind = 1748 type Bones fileNamesInd IMG-0908-00037  
ind = 1747 type Bones fileNamesInd IMG-0908-00036  
ind = 1746 type Bones fileNamesInd IMG-0908-00035  
ind = 1745 type Bones fileNamesInd IMG-0908-00034  
ind = 1744 type Bones fileNamesInd IMG-0908-00033  
ind = 1743 type Bones fileNamesInd IMG-0908-00032  
ind = 1742 type Bones fileNamesInd IMG-0908-00031  
ind = 1741 type Bones fileNamesInd IMG-0908-00030

```

ind = 1740 type Bones fileNamesInd IMG-0908-00029
ind = 1739 type Bones fileNamesInd IMG-0908-00028
ind = 1738 type Bones fileNamesInd IMG-0908-00027
ind = 1737 type Bones fileNamesInd IMG-0908-00026
ind = 1736 type Bones fileNamesInd IMG-0908-00025
ind = 1735 type Bones fileNamesInd IMG-0908-00024
ind = 1734 type Bones fileNamesInd IMG-0908-00023
ind = 1733 type Bones fileNamesInd IMG-0908-00022
ind = 1732 type Bones fileNamesInd IMG-0908-00021
ind = 1731 type Bones fileNamesInd IMG-0908-00020
ind = 1730 type Bones fileNamesInd IMG-0908-00019
ind = 1729 type Bones fileNamesInd IMG-0908-00018
ind = 1728 type Bones fileNamesInd IMG-0908-00017
ind = 1727 type Bones fileNamesInd IMG-0908-00016
ind = 1726 type Bones fileNamesInd IMG-0908-00015
ind = 1725 type Bones fileNamesInd IMG-0908-00014
ind = 1724 type Bones fileNamesInd IMG-0908-00013
ind = 1723 type Bones fileNamesInd IMG-0908-00012
ind = 1722 type Bones fileNamesInd IMG-0908-00011
ind = 1721 type Bones fileNamesInd IMG-0908-00010
ind = 1720 type Bones fileNamesInd IMG-0908-00009
ind = 1719 type Empty fileNamesInd IMG-0908-00008
ind = 1718 type Empty fileNamesInd IMG-0908-00007
ind = 1717 type Empty fileNamesInd IMG-0908-00006
ind = 1716 type Empty fileNamesInd IMG-0908-00005
ind = 1715 type Empty fileNamesInd IMG-0908-00004
ind = 1714 type Empty fileNamesInd IMG-0908-00003
ind = 1713 type Empty fileNamesInd IMG-0908-00002
ind = 1712 type Empty fileNamesInd IMG-0908-00001
ind = 1711 type Empty fileNamesInd IMG-0907-00044
ind = 1710 type Empty fileNamesInd IMG-0907-00043
ind = 1709 type Empty fileNamesInd IMG-0907-00042
ind = 1708 type Empty fileNamesInd IMG-0907-00041
ind = 1707 type Irrelevant fileNamesInd IMG-0907-00040
ind = 1706 type Bones fileNamesInd IMG-0907-00039
ind = 1705 type Bones fileNamesInd IMG-0907-00038
ind = 1704 type Bones fileNamesInd IMG-0907-00037
ind = 1703 type Bones fileNamesInd IMG-0907-00036
ind = 1702 type Bones fileNamesInd IMG-0907-00035

```

ind = 1701 type Bones fileNamesInd IMG-0907-00034  
ind = 1700 type Bones fileNamesInd IMG-0907-00033  
ind = 1699 type Bones fileNamesInd IMG-0907-00032  
ind = 1698 type Bones fileNamesInd IMG-0907-00031  
ind = 1697 type Bones fileNamesInd IMG-0907-00030  
ind = 1696 type Bones fileNamesInd IMG-0907-00029  
ind = 1695 type Bones fileNamesInd IMG-0907-00028  
ind = 1694 type Bones fileNamesInd IMG-0907-00027  
ind = 1693 type Bones fileNamesInd IMG-0907-00026  
ind = 1692 type Bones fileNamesInd IMG-0907-00025  
ind = 1691 type Bones fileNamesInd IMG-0907-00024  
ind = 1690 type Bones fileNamesInd IMG-0907-00023  
ind = 1689 type Bones fileNamesInd IMG-0907-00022  
ind = 1688 type Bones fileNamesInd IMG-0907-00021  
ind = 1687 type Bones fileNamesInd IMG-0907-00020  
ind = 1686 type Irrelevant fileNamesInd IMG-0907-00019  
ind = 1685 type Irrelevant fileNamesInd IMG-0907-00018  
ind = 1684 type Empty fileNamesInd IMG-0907-00017  
ind = 1683 type Empty fileNamesInd IMG-0907-00016  
ind = 1682 type Irrelevant fileNamesInd IMG-0907-00015  
ind = 1681 type Irrelevant fileNamesInd IMG-0907-00014  
ind = 1680 type Empty fileNamesInd IMG-0907-00013  
ind = 1679 type Empty fileNamesInd IMG-0907-00012  
ind = 1678 type Empty fileNamesInd IMG-0907-00011  
ind = 1677 type Empty fileNamesInd IMG-0907-00010  
ind = 1676 type Empty fileNamesInd IMG-0907-00009  
ind = 1675 type Empty fileNamesInd IMG-0907-00008  
ind = 1674 type Empty fileNamesInd IMG-0907-00007  
ind = 1673 type Empty fileNamesInd IMG-0907-00006  
ind = 1672 type Empty fileNamesInd IMG-0907-00005  
ind = 1671 type Empty fileNamesInd IMG-0907-00004  
ind = 1670 type Empty fileNamesInd IMG-0907-00003  
ind = 1669 type Empty fileNamesInd IMG-0907-00002  
ind = 1668 type Empty fileNamesInd IMG-0907-00001  
ind = 1667 type Empty fileNamesInd IMG-0906-00034  
ind = 1666 type Empty fileNamesInd IMG-0906-00033  
ind = 1665 type Empty fileNamesInd IMG-0906-00032  
ind = 1664 type Empty fileNamesInd IMG-0906-00031  
ind = 1663 type Bones fileNamesInd IMG-0906-00030

ind = 1662 type Bones fileNamesInd IMG-0906-00029  
ind = 1661 type Bones fileNamesInd IMG-0906-00028  
ind = 1660 type Bones fileNamesInd IMG-0906-00027  
ind = 1659 type Bones fileNamesInd IMG-0906-00026  
ind = 1658 type Bones fileNamesInd IMG-0906-00025  
ind = 1657 type Bones fileNamesInd IMG-0906-00024  
ind = 1656 type Bones fileNamesInd IMG-0906-00023  
ind = 1655 type Bones fileNamesInd IMG-0906-00022  
ind = 1654 type Bones fileNamesInd IMG-0906-00021  
ind = 1653 type Bones fileNamesInd IMG-0906-00020  
ind = 1652 type Bones fileNamesInd IMG-0906-00019  
ind = 1651 type Bones fileNamesInd IMG-0906-00018  
ind = 1650 type Bones fileNamesInd IMG-0906-00017  
ind = 1649 type Bones fileNamesInd IMG-0906-00016  
ind = 1648 type Bones fileNamesInd IMG-0906-00015  
ind = 1647 type Bones fileNamesInd IMG-0906-00014  
ind = 1646 type Bones fileNamesInd IMG-0906-00013  
ind = 1645 type Bones fileNamesInd IMG-0906-00012  
ind = 1644 type Bones fileNamesInd IMG-0906-00011  
ind = 1643 type Bones fileNamesInd IMG-0906-00010  
ind = 1642 type Bones fileNamesInd IMG-0906-00009  
ind = 1641 type Bones fileNamesInd IMG-0906-00008  
ind = 1640 type Bones fileNamesInd IMG-0906-00007  
ind = 1639 type Bones fileNamesInd IMG-0906-00006  
ind = 1638 type Bones fileNamesInd IMG-0906-00005  
ind = 1637 type Bones fileNamesInd IMG-0906-00004  
ind = 1636 type Bones fileNamesInd IMG-0906-00003  
ind = 1635 type Bones fileNamesInd IMG-0906-00002  
ind = 1634 type Bones fileNamesInd IMG-0906-00001  
ind = 1633 type Empty fileNamesInd IMG-0905-00034  
ind = 1632 type Empty fileNamesInd IMG-0905-00033  
ind = 1631 type Empty fileNamesInd IMG-0905-00032  
ind = 1630 type Empty fileNamesInd IMG-0905-00031  
ind = 1629 type Empty fileNamesInd IMG-0905-00030  
ind = 1628 type Empty fileNamesInd IMG-0905-00029  
ind = 1627 type Bones fileNamesInd IMG-0905-00028  
ind = 1626 type Bones fileNamesInd IMG-0905-00027  
ind = 1625 type Bones fileNamesInd IMG-0905-00026  
ind = 1624 type Bones fileNamesInd IMG-0905-00025

ind = 1623 type Bones fileNamesInd IMG-0905-00024  
ind = 1622 type Bones fileNamesInd IMG-0905-00023  
ind = 1621 type Bones fileNamesInd IMG-0905-00022  
ind = 1620 type Bones fileNamesInd IMG-0905-00021  
ind = 1619 type Bones fileNamesInd IMG-0905-00020  
ind = 1618 type Bones fileNamesInd IMG-0905-00019  
ind = 1617 type Bones fileNamesInd IMG-0905-00018  
ind = 1616 type Bones fileNamesInd IMG-0905-00017  
ind = 1615 type Bones fileNamesInd IMG-0905-00016  
ind = 1614 type Bones fileNamesInd IMG-0905-00015  
ind = 1613 type Bones fileNamesInd IMG-0905-00014  
ind = 1612 type Bones fileNamesInd IMG-0905-00013  
ind = 1611 type Bones fileNamesInd IMG-0905-00012  
ind = 1610 type Bones fileNamesInd IMG-0905-00011  
ind = 1609 type Bones fileNamesInd IMG-0905-00010  
ind = 1608 type Irrelevant fileNamesInd IMG-0905-00009  
ind = 1607 type Irrelevant fileNamesInd IMG-0905-00008  
ind = 1606 type Irrelevant fileNamesInd IMG-0905-00007  
ind = 1605 type Irrelevant fileNamesInd IMG-0905-00006  
ind = 1604 type Irrelevant fileNamesInd IMG-0905-00005  
ind = 1603 type Irrelevant fileNamesInd IMG-0905-00004  
ind = 1602 type Irrelevant fileNamesInd IMG-0905-00003  
ind = 1601 type Irrelevant fileNamesInd IMG-0905-00002  
ind = 1600 type Irrelevant fileNamesInd IMG-0905-00001  
ind = 1599 type Empty fileNamesInd IMG-0902-00037  
ind = 1598 type Empty fileNamesInd IMG-0902-00036  
ind = 1597 type Empty fileNamesInd IMG-0902-00035  
ind = 1596 type Empty fileNamesInd IMG-0902-00034  
ind = 1595 type Irrelevant fileNamesInd IMG-0902-00033  
ind = 1594 type Irrelevant fileNamesInd IMG-0902-00032  
ind = 1593 type Irrelevant fileNamesInd IMG-0902-00031  
ind = 1592 type Irrelevant fileNamesInd IMG-0902-00030  
ind = 1591 type Bones fileNamesInd IMG-0902-00029  
ind = 1590 type Bones fileNamesInd IMG-0902-00028  
ind = 1589 type Bones fileNamesInd IMG-0902-00027  
ind = 1588 type Bones fileNamesInd IMG-0902-00026  
ind = 1587 type Bones fileNamesInd IMG-0902-00025  
ind = 1586 type Bones fileNamesInd IMG-0902-00024  
ind = 1585 type Bones fileNamesInd IMG-0902-00023

ind = 1584 type Bones fileNamesInd IMG-0902-00022  
ind = 1583 type Bones fileNamesInd IMG-0902-00021  
ind = 1582 type Bones fileNamesInd IMG-0902-00020  
ind = 1581 type Bones fileNamesInd IMG-0902-00019  
ind = 1580 type Bones fileNamesInd IMG-0902-00018  
ind = 1579 type Bones fileNamesInd IMG-0902-00017  
ind = 1578 type Bones fileNamesInd IMG-0902-00016  
ind = 1577 type Bones fileNamesInd IMG-0902-00015  
ind = 1576 type Bones fileNamesInd IMG-0902-00014  
ind = 1575 type Bones fileNamesInd IMG-0902-00013  
ind = 1574 type Bones fileNamesInd IMG-0902-00012  
ind = 1573 type Bones fileNamesInd IMG-0902-00011  
ind = 1572 type Bones fileNamesInd IMG-0902-00010  
ind = 1571 type Bones fileNamesInd IMG-0902-00009  
ind = 1570 type Bones fileNamesInd IMG-0902-00008  
ind = 1569 type Bones fileNamesInd IMG-0902-00007  
ind = 1568 type Bones fileNamesInd IMG-0902-00006  
ind = 1567 type Bones fileNamesInd IMG-0902-00005  
ind = 1566 type Bones fileNamesInd IMG-0902-00004  
ind = 1565 type Bones fileNamesInd IMG-0902-00003  
ind = 1564 type Bones fileNamesInd IMG-0902-00002  
ind = 1563 type Bones fileNamesInd IMG-0902-00001  
ind = 1562 type Empty fileNamesInd IMG-0901-00041  
ind = 1561 type Empty fileNamesInd IMG-0901-00040  
ind = 1560 type Empty fileNamesInd IMG-0901-00039  
ind = 1559 type Empty fileNamesInd IMG-0901-00038  
ind = 1558 type Empty fileNamesInd IMG-0901-00037  
ind = 1557 type Empty fileNamesInd IMG-0901-00036  
ind = 1556 type Irrelevant fileNamesInd IMG-0901-00035  
ind = 1555 type Irrelevant fileNamesInd IMG-0901-00034  
ind = 1554 type Irrelevant fileNamesInd IMG-0901-00033  
ind = 1553 type Irrelevant fileNamesInd IMG-0901-00032  
ind = 1552 type Bones fileNamesInd IMG-0901-00031  
ind = 1551 type Bones fileNamesInd IMG-0901-00030  
ind = 1550 type Bones fileNamesInd IMG-0901-00029  
ind = 1549 type Bones fileNamesInd IMG-0901-00028  
ind = 1548 type Bones fileNamesInd IMG-0901-00027  
ind = 1547 type Bones fileNamesInd IMG-0901-00026  
ind = 1546 type Bones fileNamesInd IMG-0901-00025

```
ind = 1545 type Bones fileNamesInd IMG-0901-00024
ind = 1544 type Bones fileNamesInd IMG-0901-00023
ind = 1543 type Bones fileNamesInd IMG-0901-00022
ind = 1542 type Bones fileNamesInd IMG-0901-00021
ind = 1541 type Bones fileNamesInd IMG-0901-00020
ind = 1540 type Bones fileNamesInd IMG-0901-00019
ind = 1539 type Bones fileNamesInd IMG-0901-00018
ind = 1538 type Bones fileNamesInd IMG-0901-00017
ind = 1537 type Bones fileNamesInd IMG-0901-00016
ind = 1536 type Bones fileNamesInd IMG-0901-00015
ind = 1535 type Bones fileNamesInd IMG-0901-00014
ind = 1534 type Bones fileNamesInd IMG-0901-00013
ind = 1533 type Irrelevant fileNamesInd IMG-0901-00012
ind = 1532 type Irrelevant fileNamesInd IMG-0901-00011
ind = 1531 type Irrelevant fileNamesInd IMG-0901-00010
ind = 1530 type Irrelevant fileNamesInd IMG-0901-00009
ind = 1529 type Empty fileNamesInd IMG-0901-00008
ind = 1528 type Empty fileNamesInd IMG-0901-00007
ind = 1527 type Empty fileNamesInd IMG-0901-00006
ind = 1526 type Irrelevant fileNamesInd IMG-0901-00005
ind = 1525 type Irrelevant fileNamesInd IMG-0901-00004
ind = 1524 type Irrelevant fileNamesInd IMG-0901-00003
ind = 1523 type Irrelevant fileNamesInd IMG-0901-00002
ind = 1522 type Irrelevant fileNamesInd IMG-0901-00001
ind = 1521 type Empty fileNamesInd IMG-0888-00037
ind = 1520 type Empty fileNamesInd IMG-0888-00036
ind = 1519 type Empty fileNamesInd IMG-0888-00035
ind = 1518 type Empty fileNamesInd IMG-0888-00034
ind = 1517 type Irrelevant fileNamesInd IMG-0888-00033
ind = 1516 type Irrelevant fileNamesInd IMG-0888-00032
ind = 1515 type Irrelevant fileNamesInd IMG-0888-00031
ind = 1514 type Bones fileNamesInd IMG-0888-00030
ind = 1513 type Bones fileNamesInd IMG-0888-00029
ind = 1512 type Bones fileNamesInd IMG-0888-00028
ind = 1511 type Bones fileNamesInd IMG-0888-00027
ind = 1510 type Bones fileNamesInd IMG-0888-00026
ind = 1509 type Bones fileNamesInd IMG-0888-00025
ind = 1508 type Bones fileNamesInd IMG-0888-00024
ind = 1507 type Bones fileNamesInd IMG-0888-00023
```



```

ind = 1506 type Bones fileNamesInd IMG-0888-00022
ind = 1505 type Bones fileNamesInd IMG-0888-00021
ind = 1504 type Bones fileNamesInd IMG-0888-00020
ind = 1503 type Bones fileNamesInd IMG-0888-00019
ind = 1502 type Bones fileNamesInd IMG-0888-00018
ind = 1501 type Bones fileNamesInd IMG-0888-00017
ind = 1500 type Bones fileNamesInd IMG-0888-00016
ind = 1499 type Bones fileNamesInd IMG-0888-00015
ind = 1498 type Bones fileNamesInd IMG-0888-00014
ind = 1497 type Bones fileNamesInd IMG-0888-00013
ind = 1496 type Bones fileNamesInd IMG-0888-00012
ind = 1495 type Bones fileNamesInd IMG-0888-00011
ind = 1494 type Bones fileNamesInd IMG-0888-00010
ind = 1493 type Bones fileNamesInd IMG-0888-00009
ind = 1492 type Bones fileNamesInd IMG-0888-00008
ind = 1491 type Bones fileNamesInd IMG-0888-00007
ind = 1490 type Bones fileNamesInd IMG-0888-00006
ind = 1489 type Bones fileNamesInd IMG-0888-00005
ind = 1488 type Bones fileNamesInd IMG-0888-00004
ind = 1487 type Bones fileNamesInd IMG-0888-00003
ind = 1486 type Bones fileNamesInd IMG-0888-00002
ind = 1485 type Bones fileNamesInd IMG-0888-00001
ind = 1484 type Empty fileNamesInd IMG-0801-00037
ind = 1483 type Empty fileNamesInd IMG-0801-00036
ind = 1482 type Empty fileNamesInd IMG-0801-00035
ind = 1481 type Empty fileNamesInd IMG-0801-00034
ind = 1480 type Empty fileNamesInd IMG-0801-00033
ind = 1479 type Irrelevant fileNamesInd IMG-0801-00032
ind = 1478 type Irrelevant fileNamesInd IMG-0801-00031
ind = 1477 type Irrelevant fileNamesInd IMG-0801-00030
ind = 1476 type Irrelevant fileNamesInd IMG-0801-00029
ind = 1475 type Bones fileNamesInd IMG-0801-00028
ind = 1474 type Metastases fileNamesInd IMG-0801-00027
ind = 1473 type Metastases fileNamesInd IMG-0801-00026
ind = 1472 type GlioblastomaGBM fileNamesInd IMG-0801-00025
ind = 1471 type GlioblastomaGBM fileNamesInd IMG-0801-00024
ind = 1470 type GlioblastomaGBM fileNamesInd IMG-0801-00023
ind = 1469 type GlioblastomaGBM fileNamesInd IMG-0801-00022
ind = 1468 type GlioblastomaGBM fileNamesInd IMG-0801-00021

```

```
ind = 1467 type GlioblastomaGBM fileNamesInd IMG-0801-00020
ind = 1466 type GlioblastomaGBM fileNamesInd IMG-0801-00019
ind = 1465 type GlioblastomaGBM fileNamesInd IMG-0801-00018
ind = 1464 type GlioblastomaGBM fileNamesInd IMG-0801-00017
ind = 1463 type GlioblastomaGBM fileNamesInd IMG-0801-00016
ind = 1462 type GlioblastomaGBM fileNamesInd IMG-0801-00015
ind = 1461 type GlioblastomaGBM fileNamesInd IMG-0801-00014
ind = 1460 type GlioblastomaGBM fileNamesInd IMG-0801-00013
ind = 1459 type GlioblastomaGBM fileNamesInd IMG-0801-00012
ind = 1458 type GlioblastomaGBM fileNamesInd IMG-0801-00011
ind = 1457 type GlioblastomaGBM fileNamesInd IMG-0801-00010
ind = 1456 type GlioblastomaGBM fileNamesInd IMG-0801-00009
ind = 1455 type GlioblastomaGBM fileNamesInd IMG-0801-00008
ind = 1454 type GlioblastomaGBM fileNamesInd IMG-0801-00007
ind = 1453 type Irrelevant fileNamesInd IMG-0801-00006
ind = 1452 type Irrelevant fileNamesInd IMG-0801-00005
ind = 1451 type Irrelevant fileNamesInd IMG-0801-00004
ind = 1450 type Empty fileNamesInd IMG-0801-00003
ind = 1449 type Empty fileNamesInd IMG-0801-00002
ind = 1448 type Empty fileNamesInd IMG-0801-00001
ind = 1447 type Empty fileNamesInd IMG-0772-00048
ind = 1446 type Empty fileNamesInd IMG-0772-00047
ind = 1445 type Empty fileNamesInd IMG-0772-00046
ind = 1444 type Empty fileNamesInd IMG-0772-00045
ind = 1443 type Empty fileNamesInd IMG-0772-00044
ind = 1442 type Empty fileNamesInd IMG-0772-00043
ind = 1441 type Bones fileNamesInd IMG-0772-00042
ind = 1440 type Bones fileNamesInd IMG-0772-00041
ind = 1439 type Bones fileNamesInd IMG-0772-00040
ind = 1438 type Bones fileNamesInd IMG-0772-00039
ind = 1437 type Bones fileNamesInd IMG-0772-00038
ind = 1436 type Bones fileNamesInd IMG-0772-00037
ind = 1435 type Bones fileNamesInd IMG-0772-00036
ind = 1434 type Bones fileNamesInd IMG-0772-00035
ind = 1433 type Bones fileNamesInd IMG-0772-00034
ind = 1432 type Bones fileNamesInd IMG-0772-00033
ind = 1431 type Bones fileNamesInd IMG-0772-00032
ind = 1430 type Bones fileNamesInd IMG-0772-00031
ind = 1429 type Bones fileNamesInd IMG-0772-00030
```

```

ind = 1428 type Bones fileNamesInd IMG-0772-00029
ind = 1427 type Bones fileNamesInd IMG-0772-00028
ind = 1426 type GlioblastomaGBM fileNamesInd IMG-0772-00027
ind = 1425 type GlioblastomaGBM fileNamesInd IMG-0772-00026
ind = 1424 type GlioblastomaGBM fileNamesInd IMG-0772-00025
ind = 1423 type Bones fileNamesInd IMG-0772-00024
ind = 1422 type Irrelevant fileNamesInd IMG-0772-00023
ind = 1421 type Irrelevant fileNamesInd IMG-0772-00022
ind = 1420 type Irrelevant fileNamesInd IMG-0772-00021
ind = 1419 type Irrelevant fileNamesInd IMG-0772-00020
ind = 1418 type Irrelevant fileNamesInd IMG-0772-00019
ind = 1417 type Irrelevant fileNamesInd IMG-0772-00018
ind = 1416 type Irrelevant fileNamesInd IMG-0772-00017
ind = 1415 type Empty fileNamesInd IMG-0772-00016
ind = 1414 type Empty fileNamesInd IMG-0772-00015
ind = 1413 type Empty fileNamesInd IMG-0772-00014
ind = 1412 type Empty fileNamesInd IMG-0772-00013
ind = 1411 type Empty fileNamesInd IMG-0772-00012
ind = 1410 type Irrelevant fileNamesInd IMG-0772-00011
ind = 1409 type Empty fileNamesInd IMG-0772-00010
ind = 1408 type Irrelevant fileNamesInd IMG-0772-00009
ind = 1407 type Irrelevant fileNamesInd IMG-0772-00008
ind = 1406 type Irrelevant fileNamesInd IMG-0772-00007
ind = 1405 type Irrelevant fileNamesInd IMG-0772-00006
ind = 1404 type Irrelevant fileNamesInd IMG-0772-00005
ind = 1403 type Irrelevant fileNamesInd IMG-0772-00004
ind = 1402 type Irrelevant fileNamesInd IMG-0772-00003
ind = 1401 type Empty fileNamesInd IMG-0772-00002
ind = 1400 type Empty fileNamesInd IMG-0772-00001
ind = 1399 type Empty fileNamesInd IMG-0771-00048
ind = 1398 type Empty fileNamesInd IMG-0771-00047
ind = 1397 type Empty fileNamesInd IMG-0771-00046
ind = 1396 type Empty fileNamesInd IMG-0771-00045
ind = 1395 type Empty fileNamesInd IMG-0771-00044
ind = 1394 type Bones fileNamesInd IMG-0771-00043
ind = 1393 type Bones fileNamesInd IMG-0771-00042
ind = 1392 type Bones fileNamesInd IMG-0771-00041
ind = 1391 type Bones fileNamesInd IMG-0771-00040
ind = 1390 type Bones fileNamesInd IMG-0771-00039

```

ind = 1389 type Bones fileNamesInd IMG-0771-00038  
ind = 1388 type Bones fileNamesInd IMG-0771-00037  
ind = 1387 type Bones fileNamesInd IMG-0771-00036  
ind = 1386 type Bones fileNamesInd IMG-0771-00035  
ind = 1385 type Bones fileNamesInd IMG-0771-00034  
ind = 1384 type Bones fileNamesInd IMG-0771-00033  
ind = 1383 type Bones fileNamesInd IMG-0771-00032  
ind = 1382 type Bones fileNamesInd IMG-0771-00031  
ind = 1381 type Bones fileNamesInd IMG-0771-00030  
ind = 1380 type Bones fileNamesInd IMG-0771-00029  
ind = 1379 type Bones fileNamesInd IMG-0771-00028  
ind = 1378 type Bones fileNamesInd IMG-0771-00027  
ind = 1377 type Bones fileNamesInd IMG-0771-00026  
ind = 1376 type Bones fileNamesInd IMG-0771-00025  
ind = 1375 type Bones fileNamesInd IMG-0771-00024  
ind = 1374 type Bones fileNamesInd IMG-0771-00023  
ind = 1373 type Bones fileNamesInd IMG-0771-00022  
ind = 1372 type Bones fileNamesInd IMG-0771-00021  
ind = 1371 type Bones fileNamesInd IMG-0771-00020  
ind = 1370 type Irrelevant fileNamesInd IMG-0771-00019  
ind = 1369 type Irrelevant fileNamesInd IMG-0771-00018  
ind = 1368 type Empty fileNamesInd IMG-0771-00017  
ind = 1367 type Empty fileNamesInd IMG-0771-00016  
ind = 1366 type Empty fileNamesInd IMG-0771-00015  
ind = 1365 type Irrelevant fileNamesInd IMG-0771-00014  
ind = 1364 type Empty fileNamesInd IMG-0771-00013  
ind = 1363 type Empty fileNamesInd IMG-0771-00012  
ind = 1362 type Empty fileNamesInd IMG-0771-00011  
ind = 1361 type Empty fileNamesInd IMG-0771-00010  
ind = 1360 type Empty fileNamesInd IMG-0771-00009  
ind = 1359 type Empty fileNamesInd IMG-0771-00008  
ind = 1358 type Empty fileNamesInd IMG-0771-00007  
ind = 1357 type Empty fileNamesInd IMG-0771-00006  
ind = 1356 type Empty fileNamesInd IMG-0771-00005  
ind = 1355 type Empty fileNamesInd IMG-0771-00004  
ind = 1354 type Empty fileNamesInd IMG-0771-00003  
ind = 1353 type Empty fileNamesInd IMG-0771-00002  
ind = 1352 type Empty fileNamesInd IMG-0771-00001  
ind = 1351 type Empty fileNamesInd IMG-0441-00035

```

ind = 1350 type Empty fileNamesInd IMG-0441-00034
ind = 1349 type Empty fileNamesInd IMG-0441-00033
ind = 1348 type Empty fileNamesInd IMG-0441-00032
ind = 1347 type Empty fileNamesInd IMG-0441-00031
ind = 1346 type Empty fileNamesInd IMG-0441-00030
ind = 1345 type Irrelevant fileNamesInd IMG-0441-00029
ind = 1344 type GlioblastomaGBM fileNamesInd IMG-0441-00028
ind = 1343 type GlioblastomaGBM fileNamesInd IMG-0441-00027
ind = 1342 type GlioblastomaGBM fileNamesInd IMG-0441-00026
ind = 1341 type GlioblastomaGBM fileNamesInd IMG-0441-00025
ind = 1340 type GlioblastomaGBM fileNamesInd IMG-0441-00024
ind = 1339 type GlioblastomaGBM fileNamesInd IMG-0441-00023
ind = 1338 type GlioblastomaGBM fileNamesInd IMG-0441-00022
ind = 1337 type GlioblastomaGBM fileNamesInd IMG-0441-00021
ind = 1336 type GlioblastomaGBM fileNamesInd IMG-0441-00020
ind = 1335 type GlioblastomaGBM fileNamesInd IMG-0441-00019
ind = 1334 type GlioblastomaGBM fileNamesInd IMG-0441-00018
ind = 1333 type GlioblastomaGBM fileNamesInd IMG-0441-00017
ind = 1332 type GlioblastomaGBM fileNamesInd IMG-0441-00016
ind = 1331 type GlioblastomaGBM fileNamesInd IMG-0441-00015
ind = 1330 type GlioblastomaGBM fileNamesInd IMG-0441-00014
ind = 1329 type GlioblastomaGBM fileNamesInd IMG-0441-00013
ind = 1328 type GlioblastomaGBM fileNamesInd IMG-0441-00012
ind = 1327 type GlioblastomaGBM fileNamesInd IMG-0441-00011
ind = 1326 type GlioblastomaGBM fileNamesInd IMG-0441-00010
ind = 1325 type GlioblastomaGBM fileNamesInd IMG-0441-00009
ind = 1324 type Empty fileNamesInd IMG-0441-00008
ind = 1323 type Empty fileNamesInd IMG-0441-00007
ind = 1322 type Irrelevant fileNamesInd IMG-0441-00006
ind = 1321 type Irrelevant fileNamesInd IMG-0441-00005
ind = 1320 type Empty fileNamesInd IMG-0441-00004
ind = 1319 type Empty fileNamesInd IMG-0441-00003
ind = 1318 type Empty fileNamesInd IMG-0441-00002
ind = 1317 type Empty fileNamesInd IMG-0441-00001
ind = 1316 type Empty fileNamesInd IMG-0405-00036
ind = 1315 type Empty fileNamesInd IMG-0405-00035
ind = 1314 type Empty fileNamesInd IMG-0405-00034
ind = 1313 type Irrelevant fileNamesInd IMG-0405-00033
ind = 1312 type Irrelevant fileNamesInd IMG-0405-00032

```

```

ind = 1311 type Bones fileNamesInd IMG-0405-00031
ind = 1310 type Bones fileNamesInd IMG-0405-00030
ind = 1309 type Bones fileNamesInd IMG-0405-00029
ind = 1308 type Bones fileNamesInd IMG-0405-00028
ind = 1307 type Bones fileNamesInd IMG-0405-00027
ind = 1306 type Bones fileNamesInd IMG-0405-00026
ind = 1305 type Bones fileNamesInd IMG-0405-00025
ind = 1304 type Bones fileNamesInd IMG-0405-00024
ind = 1303 type Bones fileNamesInd IMG-0405-00023
ind = 1302 type GlioblastomaGBM fileNamesInd IMG-0405-00022
ind = 1301 type GlioblastomaGBM fileNamesInd IMG-0405-00021
ind = 1300 type GlioblastomaGBM fileNamesInd IMG-0405-00020
ind = 1299 type GlioblastomaGBM fileNamesInd IMG-0405-00019
ind = 1298 type GlioblastomaGBM fileNamesInd IMG-0405-00018
ind = 1297 type GlioblastomaGBM fileNamesInd IMG-0405-00017
ind = 1296 type GlioblastomaGBM fileNamesInd IMG-0405-00016
ind = 1295 type GlioblastomaGBM fileNamesInd IMG-0405-00015
ind = 1294 type Bones fileNamesInd IMG-0405-00014
ind = 1293 type Bones fileNamesInd IMG-0405-00013
ind = 1292 type Bones fileNamesInd IMG-0405-00012
ind = 1291 type Bones fileNamesInd IMG-0405-00011
ind = 1290 type Bones fileNamesInd IMG-0405-00010
ind = 1289 type Bones fileNamesInd IMG-0405-00009
ind = 1288 type Bones fileNamesInd IMG-0405-00008
ind = 1287 type Bones fileNamesInd IMG-0405-00007
ind = 1286 type Bones fileNamesInd IMG-0405-00006
ind = 1285 type Irrelevant fileNamesInd IMG-0405-00005
ind = 1284 type Irrelevant fileNamesInd IMG-0405-00004
ind = 1283 type Irrelevant fileNamesInd IMG-0405-00003
ind = 1282 type Irrelevant fileNamesInd IMG-0405-00002
ind = 1281 type Irrelevant fileNamesInd IMG-0405-00001
ind = 1280 type Empty fileNamesInd IMG-0404-00036
ind = 1279 type Empty fileNamesInd IMG-0404-00035
ind = 1278 type Empty fileNamesInd IMG-0404-00034
ind = 1277 type Empty fileNamesInd IMG-0404-00033
ind = 1276 type Irrelevant fileNamesInd IMG-0404-00032
ind = 1275 type Irrelevant fileNamesInd IMG-0404-00031
ind = 1274 type Irrelevant fileNamesInd IMG-0404-00030
ind = 1273 type Bones fileNamesInd IMG-0404-00029

```

```

ind = 1272 type GlioblastomaGBM fileNamesInd IMG-0404-00028
ind = 1271 type GlioblastomaGBM fileNamesInd IMG-0404-00027
ind = 1270 type GlioblastomaGBM fileNamesInd IMG-0404-00026
ind = 1269 type GlioblastomaGBM fileNamesInd IMG-0404-00025
ind = 1268 type GlioblastomaGBM fileNamesInd IMG-0404-00024
ind = 1267 type GlioblastomaGBM fileNamesInd IMG-0404-00023
ind = 1266 type GlioblastomaGBM fileNamesInd IMG-0404-00022
ind = 1265 type GlioblastomaGBM fileNamesInd IMG-0404-00021
ind = 1264 type GlioblastomaGBM fileNamesInd IMG-0404-00020
ind = 1263 type GlioblastomaGBM fileNamesInd IMG-0404-00019
ind = 1262 type GlioblastomaGBM fileNamesInd IMG-0404-00018
ind = 1261 type GlioblastomaGBM fileNamesInd IMG-0404-00017
ind = 1260 type GlioblastomaGBM fileNamesInd IMG-0404-00016
ind = 1259 type GlioblastomaGBM fileNamesInd IMG-0404-00015
ind = 1258 type GlioblastomaGBM fileNamesInd IMG-0404-00014
ind = 1257 type Bones fileNamesInd IMG-0404-00013
ind = 1256 type Bones fileNamesInd IMG-0404-00012
ind = 1255 type Metastases fileNamesInd IMG-0404-00011
ind = 1254 type Irrelevant fileNamesInd IMG-0404-00010
ind = 1253 type Irrelevant fileNamesInd IMG-0404-00009
ind = 1252 type Irrelevant fileNamesInd IMG-0404-00008
ind = 1251 type Irrelevant fileNamesInd IMG-0404-00007
ind = 1250 type Irrelevant fileNamesInd IMG-0404-00006
ind = 1249 type Irrelevant fileNamesInd IMG-0404-00005
ind = 1248 type Irrelevant fileNamesInd IMG-0404-00004
ind = 1247 type Empty fileNamesInd IMG-0404-00003
ind = 1246 type Irrelevant fileNamesInd IMG-0404-00002
ind = 1245 type Irrelevant fileNamesInd IMG-0404-00001
ind = 1244 type Empty fileNamesInd IMG-0402-00035
ind = 1243 type Empty fileNamesInd IMG-0402-00034
ind = 1242 type Empty fileNamesInd IMG-0402-00033
ind = 1241 type Irrelevant fileNamesInd IMG-0402-00032
ind = 1240 type Bones fileNamesInd IMG-0402-00031
ind = 1239 type Bones fileNamesInd IMG-0402-00030
ind = 1238 type Bones fileNamesInd IMG-0402-00029
ind = 1237 type Bones fileNamesInd IMG-0402-00028
ind = 1236 type Bones fileNamesInd IMG-0402-00027
ind = 1235 type Bones fileNamesInd IMG-0402-00026
ind = 1234 type Bones fileNamesInd IMG-0402-00025

```

```
ind = 1233 type Bones fileNamesInd IMG-0402-00024
ind = 1232 type Bones fileNamesInd IMG-0402-00023
ind = 1231 type Bones fileNamesInd IMG-0402-00022
ind = 1230 type Bones fileNamesInd IMG-0402-00021
ind = 1229 type Bones fileNamesInd IMG-0402-00020
ind = 1228 type Bones fileNamesInd IMG-0402-00019
ind = 1227 type Bones fileNamesInd IMG-0402-00018
ind = 1226 type Bones fileNamesInd IMG-0402-00017
ind = 1225 type Bones fileNamesInd IMG-0402-00016
ind = 1224 type Bones fileNamesInd IMG-0402-00015
ind = 1223 type Bones fileNamesInd IMG-0402-00014
ind = 1222 type Bones fileNamesInd IMG-0402-00013
ind = 1221 type Bones fileNamesInd IMG-0402-00012
ind = 1220 type Bones fileNamesInd IMG-0402-00011
ind = 1219 type Bones fileNamesInd IMG-0402-00010
ind = 1218 type Bones fileNamesInd IMG-0402-00009
ind = 1217 type Bones fileNamesInd IMG-0402-00008
ind = 1216 type Bones fileNamesInd IMG-0402-00007
ind = 1215 type Bones fileNamesInd IMG-0402-00006
ind = 1214 type Bones fileNamesInd IMG-0402-00005
ind = 1213 type Bones fileNamesInd IMG-0402-00004
ind = 1212 type Bones fileNamesInd IMG-0402-00003
ind = 1211 type Bones fileNamesInd IMG-0402-00002
ind = 1210 type Bones fileNamesInd IMG-0402-00001
ind = 1209 type Empty fileNamesInd IMG-0311-00038
ind = 1208 type Empty fileNamesInd IMG-0311-00037
ind = 1207 type Empty fileNamesInd IMG-0311-00036
ind = 1206 type Empty fileNamesInd IMG-0311-00035
ind = 1205 type Irrelevant fileNamesInd IMG-0311-00034
ind = 1204 type Bones fileNamesInd IMG-0311-00033
ind = 1203 type Bones fileNamesInd IMG-0311-00032
ind = 1202 type Bones fileNamesInd IMG-0311-00031
ind = 1201 type Bones fileNamesInd IMG-0311-00030
ind = 1200 type Bones fileNamesInd IMG-0311-00029
ind = 1199 type Bones fileNamesInd IMG-0311-00028
ind = 1198 type Bones fileNamesInd IMG-0311-00027
ind = 1197 type Bones fileNamesInd IMG-0311-00026
ind = 1196 type Bones fileNamesInd IMG-0311-00025
ind = 1195 type Bones fileNamesInd IMG-0311-00024
```



```

ind = 1194 type Bones fileNamesInd IMG-0311-00023
ind = 1193 type Bones fileNamesInd IMG-0311-00022
ind = 1192 type Bones fileNamesInd IMG-0311-00021
ind = 1191 type Bones fileNamesInd IMG-0311-00020
ind = 1190 type Metastases fileNamesInd IMG-0311-00019
ind = 1189 type Metastases fileNamesInd IMG-0311-00018
ind = 1188 type Metastases fileNamesInd IMG-0311-00017
ind = 1187 type Metastases fileNamesInd IMG-0311-00016
ind = 1186 type Metastases fileNamesInd IMG-0311-00015
ind = 1185 type Metastases fileNamesInd IMG-0311-00014
ind = 1184 type Metastases fileNamesInd IMG-0311-00013
ind = 1183 type Metastases fileNamesInd IMG-0311-00012
ind = 1182 type Metastases fileNamesInd IMG-0311-00011
ind = 1181 type Irrelevant fileNamesInd IMG-0311-00010
ind = 1180 type Irrelevant fileNamesInd IMG-0311-00009
ind = 1179 type Irrelevant fileNamesInd IMG-0311-00008
ind = 1178 type Irrelevant fileNamesInd IMG-0311-00007
ind = 1177 type Irrelevant fileNamesInd IMG-0311-00006
ind = 1176 type Irrelevant fileNamesInd IMG-0311-00005
ind = 1175 type Irrelevant fileNamesInd IMG-0311-00004
ind = 1174 type Irrelevant fileNamesInd IMG-0311-00003
ind = 1173 type Irrelevant fileNamesInd IMG-0311-00002
ind = 1172 type Irrelevant fileNamesInd IMG-0311-00001
ind = 1171 type Empty fileNamesInd IMG-0302-00038
ind = 1170 type Empty fileNamesInd IMG-0302-00037
ind = 1169 type Empty fileNamesInd IMG-0302-00036
ind = 1168 type Bones fileNamesInd IMG-0302-00035
ind = 1167 type Bones fileNamesInd IMG-0302-00034
ind = 1166 type Bones fileNamesInd IMG-0302-00033
ind = 1165 type Bones fileNamesInd IMG-0302-00032
ind = 1164 type Bones fileNamesInd IMG-0302-00031
ind = 1163 type Bones fileNamesInd IMG-0302-00030
ind = 1162 type Bones fileNamesInd IMG-0302-00029
ind = 1161 type Bones fileNamesInd IMG-0302-00028
ind = 1160 type Bones fileNamesInd IMG-0302-00027
ind = 1159 type Bones fileNamesInd IMG-0302-00026
ind = 1158 type Bones fileNamesInd IMG-0302-00025
ind = 1157 type Bones fileNamesInd IMG-0302-00024
ind = 1156 type Bones fileNamesInd IMG-0302-00023

```

```
ind = 1155 type Bones fileNamesInd IMG-0302-00022
ind = 1154 type Bones fileNamesInd IMG-0302-00021
ind = 1153 type Bones fileNamesInd IMG-0302-00020
ind = 1152 type Bones fileNamesInd IMG-0302-00019
ind = 1151 type Bones fileNamesInd IMG-0302-00018
ind = 1150 type Bones fileNamesInd IMG-0302-00017
ind = 1149 type Bones fileNamesInd IMG-0302-00016
ind = 1148 type Bones fileNamesInd IMG-0302-00015
ind = 1147 type Bones fileNamesInd IMG-0302-00014
ind = 1146 type Bones fileNamesInd IMG-0302-00013
ind = 1145 type Bones fileNamesInd IMG-0302-00012
ind = 1144 type Bones fileNamesInd IMG-0302-00011
ind = 1143 type Bones fileNamesInd IMG-0302-00010
ind = 1142 type Bones fileNamesInd IMG-0302-00009
ind = 1141 type Bones fileNamesInd IMG-0302-00008
ind = 1140 type Bones fileNamesInd IMG-0302-00007
ind = 1139 type Bones fileNamesInd IMG-0302-00006
ind = 1138 type Bones fileNamesInd IMG-0302-00005
ind = 1137 type Bones fileNamesInd IMG-0302-00004
ind = 1136 type Bones fileNamesInd IMG-0302-00003
ind = 1135 type Bones fileNamesInd IMG-0302-00002
ind = 1134 type Bones fileNamesInd IMG-0302-00001
ind = 1133 type Empty fileNamesInd IMG-0201-00036
ind = 1132 type Empty fileNamesInd IMG-0201-00035
ind = 1131 type Empty fileNamesInd IMG-0201-00034
ind = 1130 type Empty fileNamesInd IMG-0201-00033
ind = 1129 type Irrelevant fileNamesInd IMG-0201-00032
ind = 1128 type Irrelevant fileNamesInd IMG-0201-00031
ind = 1127 type Bones fileNamesInd IMG-0201-00030
ind = 1126 type Bones fileNamesInd IMG-0201-00029
ind = 1125 type Bones fileNamesInd IMG-0201-00028
ind = 1124 type Bones fileNamesInd IMG-0201-00027
ind = 1123 type Bones fileNamesInd IMG-0201-00026
ind = 1122 type Bones fileNamesInd IMG-0201-00025
ind = 1121 type GlioblastomaGBM fileNamesInd IMG-0201-00024
ind = 1120 type GlioblastomaGBM fileNamesInd IMG-0201-00023
ind = 1119 type GlioblastomaGBM fileNamesInd IMG-0201-00022
ind = 1118 type GlioblastomaGBM fileNamesInd IMG-0201-00021
ind = 1117 type Bones fileNamesInd IMG-0201-00020
```

```

ind = 1116 type Bones fileNamesInd IMG-0201-00019
ind = 1115 type Bones fileNamesInd IMG-0201-00018
ind = 1114 type Bones fileNamesInd IMG-0201-00017
ind = 1113 type Bones fileNamesInd IMG-0201-00016
ind = 1112 type Bones fileNamesInd IMG-0201-00015
ind = 1111 type GlioblastomaGBM fileNamesInd IMG-0201-00014
ind = 1110 type GlioblastomaGBM fileNamesInd IMG-0201-00013
ind = 1109 type Metastases fileNamesInd IMG-0201-00012
ind = 1108 type Metastases fileNamesInd IMG-0201-00011
ind = 1107 type Metastases fileNamesInd IMG-0201-00010
ind = 1106 type Irrelevant fileNamesInd IMG-0201-00009
ind = 1105 type Irrelevant fileNamesInd IMG-0201-00008
ind = 1104 type Irrelevant fileNamesInd IMG-0201-00007
ind = 1103 type Empty fileNamesInd IMG-0201-00006
ind = 1102 type Empty fileNamesInd IMG-0201-00005
ind = 1101 type Empty fileNamesInd IMG-0201-00004
ind = 1100 type Empty fileNamesInd IMG-0201-00003
ind = 1099 type Empty fileNamesInd IMG-0201-00002
ind = 1098 type Empty fileNamesInd IMG-0201-00001
ind = 1097 type Bones fileNamesInd IMG-0110-00048
ind = 1096 type Empty fileNamesInd IMG-0110-00047
ind = 1095 type Empty fileNamesInd IMG-0110-00046
ind = 1094 type Empty fileNamesInd IMG-0110-00045
ind = 1093 type Empty fileNamesInd IMG-0110-00044
ind = 1092 type Empty fileNamesInd IMG-0110-00043
ind = 1091 type Empty fileNamesInd IMG-0110-00042
ind = 1090 type Empty fileNamesInd IMG-0110-00041
ind = 1089 type Empty fileNamesInd IMG-0110-00040
ind = 1088 type Empty fileNamesInd IMG-0110-00039
ind = 1087 type Empty fileNamesInd IMG-0110-00038
ind = 1086 type Empty fileNamesInd IMG-0110-00037
ind = 1085 type Empty fileNamesInd IMG-0110-00036
ind = 1084 type Empty fileNamesInd IMG-0110-00035
ind = 1083 type Empty fileNamesInd IMG-0110-00034
ind = 1082 type Empty fileNamesInd IMG-0110-00033
ind = 1081 type Empty fileNamesInd IMG-0110-00032
ind = 1080 type Empty fileNamesInd IMG-0110-00031
ind = 1079 type Empty fileNamesInd IMG-0110-00030
ind = 1078 type Empty fileNamesInd IMG-0110-00029

```

```
ind = 1077 type Empty fileNamesInd IMG-0110-00028
ind = 1076 type Empty fileNamesInd IMG-0110-00027
ind = 1075 type Empty fileNamesInd IMG-0110-00026
ind = 1074 type Empty fileNamesInd IMG-0110-00025
ind = 1073 type Empty fileNamesInd IMG-0110-00024
ind = 1072 type Empty fileNamesInd IMG-0110-00023
ind = 1071 type Empty fileNamesInd IMG-0110-00022
ind = 1070 type Empty fileNamesInd IMG-0110-00021
ind = 1069 type Empty fileNamesInd IMG-0110-00020
ind = 1068 type Empty fileNamesInd IMG-0110-00019
ind = 1067 type Empty fileNamesInd IMG-0110-00018
ind = 1066 type Empty fileNamesInd IMG-0110-00017
ind = 1065 type Empty fileNamesInd IMG-0110-00016
ind = 1064 type Empty fileNamesInd IMG-0110-00015
ind = 1063 type Empty fileNamesInd IMG-0110-00014
ind = 1062 type Empty fileNamesInd IMG-0110-00013
ind = 1061 type Empty fileNamesInd IMG-0110-00012
ind = 1060 type Empty fileNamesInd IMG-0110-00011
ind = 1059 type Empty fileNamesInd IMG-0110-00010
ind = 1058 type Empty fileNamesInd IMG-0110-00009
ind = 1057 type Empty fileNamesInd IMG-0110-00008
ind = 1056 type Empty fileNamesInd IMG-0110-00007
ind = 1055 type Empty fileNamesInd IMG-0110-00006
ind = 1054 type Empty fileNamesInd IMG-0110-00005
ind = 1053 type Empty fileNamesInd IMG-0110-00004
ind = 1052 type Empty fileNamesInd IMG-0110-00003
ind = 1051 type Empty fileNamesInd IMG-0110-00002
ind = 1050 type Empty fileNamesInd IMG-0110-00001
ind = 1049 type Empty fileNamesInd IMG-0109-00047
ind = 1048 type Empty fileNamesInd IMG-0109-00046
ind = 1047 type Empty fileNamesInd IMG-0109-00045
ind = 1046 type Empty fileNamesInd IMG-0109-00044
ind = 1045 type Empty fileNamesInd IMG-0109-00043
ind = 1044 type Empty fileNamesInd IMG-0109-00042
ind = 1043 type Bones fileNamesInd IMG-0109-00041
ind = 1042 type Bones fileNamesInd IMG-0109-00040
ind = 1041 type Bones fileNamesInd IMG-0109-00039
ind = 1040 type Bones fileNamesInd IMG-0109-00038
ind = 1039 type Bones fileNamesInd IMG-0109-00037
```

```

ind = 1038 type Bones fileNamesInd IMG-0109-00036
ind = 1037 type Bones fileNamesInd IMG-0109-00035
ind = 1036 type Bones fileNamesInd IMG-0109-00034
ind = 1035 type Bones fileNamesInd IMG-0109-00033
ind = 1034 type Bones fileNamesInd IMG-0109-00032
ind = 1033 type Bones fileNamesInd IMG-0109-00031
ind = 1032 type Bones fileNamesInd IMG-0109-00030
ind = 1031 type Bones fileNamesInd IMG-0109-00029
ind = 1030 type Bones fileNamesInd IMG-0109-00028
ind = 1029 type Bones fileNamesInd IMG-0109-00027
ind = 1028 type Bones fileNamesInd IMG-0109-00026
ind = 1027 type Metastases fileNamesInd IMG-0109-00025
ind = 1026 type Metastases fileNamesInd IMG-0109-00024
ind = 1025 type Empty fileNamesInd IMG-0109-00023
ind = 1024 type Empty fileNamesInd IMG-0109-00022
ind = 1023 type Irrelevant fileNamesInd IMG-0109-00021
ind = 1022 type Irrelevant fileNamesInd IMG-0109-00020
ind = 1021 type Irrelevant fileNamesInd IMG-0109-00019
ind = 1020 type Irrelevant fileNamesInd IMG-0109-00018
ind = 1019 type Irrelevant fileNamesInd IMG-0109-00017
ind = 1018 type Empty fileNamesInd IMG-0109-00016
ind = 1017 type Empty fileNamesInd IMG-0109-00015
ind = 1016 type Empty fileNamesInd IMG-0109-00014
ind = 1015 type Irrelevant fileNamesInd IMG-0109-00013
ind = 1014 type Irrelevant fileNamesInd IMG-0109-00012
ind = 1013 type Irrelevant fileNamesInd IMG-0109-00011
ind = 1012 type Empty fileNamesInd IMG-0109-00010
ind = 1011 type Irrelevant fileNamesInd IMG-0109-00009
ind = 1010 type Irrelevant fileNamesInd IMG-0109-00008
ind = 1009 type Irrelevant fileNamesInd IMG-0109-00007
ind = 1008 type Empty fileNamesInd IMG-0109-00006
ind = 1007 type Empty fileNamesInd IMG-0109-00005
ind = 1006 type Empty fileNamesInd IMG-0109-00004
ind = 1005 type Empty fileNamesInd IMG-0109-00003
ind = 1004 type Empty fileNamesInd IMG-0109-00002
ind = 1003 type Empty fileNamesInd IMG-0109-00001
ind = 1002 type Empty fileNamesInd IMG-0106-00037
ind = 1001 type Empty fileNamesInd IMG-0106-00036
ind = 1000 type Empty fileNamesInd IMG-0106-00035

```

ind = 999 type Empty fileNamesInd IMG-0106-00034  
ind = 998 type Empty fileNamesInd IMG-0106-00033  
ind = 997 type Empty fileNamesInd IMG-0106-00032  
ind = 996 type Empty fileNamesInd IMG-0106-00031  
ind = 995 type Empty fileNamesInd IMG-0106-00030  
ind = 994 type Irrelevant fileNamesInd IMG-0106-00029  
ind = 993 type Bones fileNamesInd IMG-0106-00028  
ind = 992 type Bones fileNamesInd IMG-0106-00027  
ind = 991 type Bones fileNamesInd IMG-0106-00026  
ind = 990 type Bones fileNamesInd IMG-0106-00025  
ind = 989 type Bones fileNamesInd IMG-0106-00024  
ind = 988 type Bones fileNamesInd IMG-0106-00023  
ind = 987 type Bones fileNamesInd IMG-0106-00022  
ind = 986 type Bones fileNamesInd IMG-0106-00021  
ind = 985 type Bones fileNamesInd IMG-0106-00020  
ind = 984 type Bones fileNamesInd IMG-0106-00019  
ind = 983 type Bones fileNamesInd IMG-0106-00018  
ind = 982 type Bones fileNamesInd IMG-0106-00017  
ind = 981 type Bones fileNamesInd IMG-0106-00016  
ind = 980 type Bones fileNamesInd IMG-0106-00015  
ind = 979 type Bones fileNamesInd IMG-0106-00014  
ind = 978 type Bones fileNamesInd IMG-0106-00013  
ind = 977 type Bones fileNamesInd IMG-0106-00012  
ind = 976 type Bones fileNamesInd IMG-0106-00011  
ind = 975 type Bones fileNamesInd IMG-0106-00010  
ind = 974 type Bones fileNamesInd IMG-0106-00009  
ind = 973 type Empty fileNamesInd IMG-0106-00008  
ind = 972 type Empty fileNamesInd IMG-0106-00007  
ind = 971 type Empty fileNamesInd IMG-0106-00006  
ind = 970 type Empty fileNamesInd IMG-0106-00005  
ind = 969 type Empty fileNamesInd IMG-0106-00004  
ind = 968 type Empty fileNamesInd IMG-0106-00003  
ind = 967 type Empty fileNamesInd IMG-0106-00002  
ind = 966 type Empty fileNamesInd IMG-0106-00001  
ind = 965 type Empty fileNamesInd IMG-0105-00037  
ind = 964 type Empty fileNamesInd IMG-0105-00036  
ind = 963 type Empty fileNamesInd IMG-0105-00035  
ind = 962 type Empty fileNamesInd IMG-0105-00034  
ind = 961 type Empty fileNamesInd IMG-0105-00033

ind = 960 type Irrelevant fileNamesInd IMG-0105-00032  
ind = 959 type Irrelevant fileNamesInd IMG-0105-00031  
ind = 958 type Irrelevant fileNamesInd IMG-0105-00030  
ind = 957 type Irrelevant fileNamesInd IMG-0105-00029  
ind = 956 type Irrelevant fileNamesInd IMG-0105-00028  
ind = 955 type Bones fileNamesInd IMG-0105-00027  
ind = 954 type Bones fileNamesInd IMG-0105-00026  
ind = 953 type Bones fileNamesInd IMG-0105-00025  
ind = 952 type Bones fileNamesInd IMG-0105-00024  
ind = 951 type Bones fileNamesInd IMG-0105-00023  
ind = 950 type Bones fileNamesInd IMG-0105-00022  
ind = 949 type Bones fileNamesInd IMG-0105-00021  
ind = 948 type Bones fileNamesInd IMG-0105-00020  
ind = 947 type Bones fileNamesInd IMG-0105-00019  
ind = 946 type Bones fileNamesInd IMG-0105-00018  
ind = 945 type Bones fileNamesInd IMG-0105-00017  
ind = 944 type Bones fileNamesInd IMG-0105-00016  
ind = 943 type Bones fileNamesInd IMG-0105-00015  
ind = 942 type Bones fileNamesInd IMG-0105-00014  
ind = 941 type Irrelevant fileNamesInd IMG-0105-00013  
ind = 940 type Irrelevant fileNamesInd IMG-0105-00012  
ind = 939 type Irrelevant fileNamesInd IMG-0105-00011  
ind = 938 type Irrelevant fileNamesInd IMG-0105-00010  
ind = 937 type Irrelevant fileNamesInd IMG-0105-00009  
ind = 936 type Irrelevant fileNamesInd IMG-0105-00008  
ind = 935 type Empty fileNamesInd IMG-0105-00007  
ind = 934 type Empty fileNamesInd IMG-0105-00006  
ind = 933 type Empty fileNamesInd IMG-0105-00005  
ind = 932 type Empty fileNamesInd IMG-0105-00004  
ind = 931 type Empty fileNamesInd IMG-0105-00003  
ind = 930 type Empty fileNamesInd IMG-0105-00002  
ind = 929 type Empty fileNamesInd IMG-0105-00001  
ind = 928 type Empty fileNamesInd IMG-0104-00051  
ind = 927 type Empty fileNamesInd IMG-0104-00050  
ind = 926 type Empty fileNamesInd IMG-0104-00049  
ind = 925 type Empty fileNamesInd IMG-0104-00048  
ind = 924 type Empty fileNamesInd IMG-0104-00047  
ind = 923 type Bones fileNamesInd IMG-0104-00046  
ind = 922 type Bones fileNamesInd IMG-0104-00045

```
ind = 921 type Bones fileNamesInd IMG-0104-00044
ind = 920 type Bones fileNamesInd IMG-0104-00043
ind = 919 type Bones fileNamesInd IMG-0104-00042
ind = 918 type Bones fileNamesInd IMG-0104-00041
ind = 917 type Bones fileNamesInd IMG-0104-00040
ind = 916 type Bones fileNamesInd IMG-0104-00039
ind = 915 type Bones fileNamesInd IMG-0104-00038
ind = 914 type Bones fileNamesInd IMG-0104-00037
ind = 913 type Bones fileNamesInd IMG-0104-00036
ind = 912 type Bones fileNamesInd IMG-0104-00035
ind = 911 type Bones fileNamesInd IMG-0104-00034
ind = 910 type Bones fileNamesInd IMG-0104-00033
ind = 909 type Bones fileNamesInd IMG-0104-00032
ind = 908 type Bones fileNamesInd IMG-0104-00031
ind = 907 type Bones fileNamesInd IMG-0104-00030
ind = 906 type Bones fileNamesInd IMG-0104-00029
ind = 905 type Bones fileNamesInd IMG-0104-00028
ind = 904 type Bones fileNamesInd IMG-0104-00027
ind = 903 type Bones fileNamesInd IMG-0104-00026
ind = 902 type Bones fileNamesInd IMG-0104-00025
ind = 901 type Bones fileNamesInd IMG-0104-00024
ind = 900 type Bones fileNamesInd IMG-0104-00023
ind = 899 type Bones fileNamesInd IMG-0104-00022
ind = 898 type Bones fileNamesInd IMG-0104-00021
ind = 897 type Bones fileNamesInd IMG-0104-00020
ind = 896 type Empty fileNamesInd IMG-0104-00019
ind = 895 type Empty fileNamesInd IMG-0104-00018
ind = 894 type Empty fileNamesInd IMG-0104-00017
ind = 893 type Empty fileNamesInd IMG-0104-00016
ind = 892 type Empty fileNamesInd IMG-0104-00015
ind = 891 type Empty fileNamesInd IMG-0104-00014
ind = 890 type Empty fileNamesInd IMG-0104-00013
ind = 889 type Empty fileNamesInd IMG-0104-00012
ind = 888 type Empty fileNamesInd IMG-0104-00011
ind = 887 type Empty fileNamesInd IMG-0104-00010
ind = 886 type Empty fileNamesInd IMG-0104-00009
ind = 885 type Empty fileNamesInd IMG-0104-00008
ind = 884 type Empty fileNamesInd IMG-0104-00007
ind = 883 type Empty fileNamesInd IMG-0104-00006
```



ind = 882 type Bones fileNamesInd IMG-0104-00005  
ind = 881 type Bones fileNamesInd IMG-0104-00004  
ind = 880 type Bones fileNamesInd IMG-0104-00003  
ind = 879 type Empty fileNamesInd IMG-0104-00002  
ind = 878 type Empty fileNamesInd IMG-0104-00001  
ind = 877 type Empty fileNamesInd IMG-0103-00051  
ind = 876 type Empty fileNamesInd IMG-0103-00050  
ind = 875 type Empty fileNamesInd IMG-0103-00049  
ind = 874 type Empty fileNamesInd IMG-0103-00048  
ind = 873 type Empty fileNamesInd IMG-0103-00047  
ind = 872 type Empty fileNamesInd IMG-0103-00046  
ind = 871 type Empty fileNamesInd IMG-0103-00045  
ind = 870 type Bones fileNamesInd IMG-0103-00044  
ind = 869 type Bones fileNamesInd IMG-0103-00043  
ind = 868 type Bones fileNamesInd IMG-0103-00042  
ind = 867 type Bones fileNamesInd IMG-0103-00041  
ind = 866 type Bones fileNamesInd IMG-0103-00040  
ind = 865 type Bones fileNamesInd IMG-0103-00039  
ind = 864 type Bones fileNamesInd IMG-0103-00038  
ind = 863 type Bones fileNamesInd IMG-0103-00037  
ind = 862 type Bones fileNamesInd IMG-0103-00036  
ind = 861 type Bones fileNamesInd IMG-0103-00035  
ind = 860 type Bones fileNamesInd IMG-0103-00034  
ind = 859 type Bones fileNamesInd IMG-0103-00033  
ind = 858 type Bones fileNamesInd IMG-0103-00032  
ind = 857 type Bones fileNamesInd IMG-0103-00031  
ind = 856 type Bones fileNamesInd IMG-0103-00030  
ind = 855 type Bones fileNamesInd IMG-0103-00029  
ind = 854 type Bones fileNamesInd IMG-0103-00028  
ind = 853 type Bones fileNamesInd IMG-0103-00027  
ind = 852 type Irrelevant fileNamesInd IMG-0103-00026  
ind = 851 type Irrelevant fileNamesInd IMG-0103-00025  
ind = 850 type Irrelevant fileNamesInd IMG-0103-00024  
ind = 849 type Irrelevant fileNamesInd IMG-0103-00023  
ind = 848 type Irrelevant fileNamesInd IMG-0103-00022  
ind = 847 type Irrelevant fileNamesInd IMG-0103-00021  
ind = 846 type Empty fileNamesInd IMG-0103-00020  
ind = 845 type Empty fileNamesInd IMG-0103-00019  
ind = 844 type Empty fileNamesInd IMG-0103-00018

ind = 843 type Empty fileNamesInd IMG-0103-00017  
ind = 842 type Irrelevant fileNamesInd IMG-0103-00016  
ind = 841 type Irrelevant fileNamesInd IMG-0103-00015  
ind = 840 type Empty fileNamesInd IMG-0103-00014  
ind = 839 type Irrelevant fileNamesInd IMG-0103-00013  
ind = 838 type Empty fileNamesInd IMG-0103-00012  
ind = 837 type Empty fileNamesInd IMG-0103-00011  
ind = 836 type Irrelevant fileNamesInd IMG-0103-00010  
ind = 835 type Empty fileNamesInd IMG-0103-00009  
ind = 834 type Empty fileNamesInd IMG-0103-00008  
ind = 833 type Empty fileNamesInd IMG-0103-00007  
ind = 832 type Empty fileNamesInd IMG-0103-00006  
ind = 831 type Empty fileNamesInd IMG-0103-00005  
ind = 830 type Empty fileNamesInd IMG-0103-00004  
ind = 829 type Empty fileNamesInd IMG-0103-00003  
ind = 828 type Empty fileNamesInd IMG-0103-00002  
ind = 827 type Empty fileNamesInd IMG-0103-00001  
ind = 826 type Empty fileNamesInd IMG-0102-00036  
ind = 825 type Empty fileNamesInd IMG-0102-00035  
ind = 824 type Empty fileNamesInd IMG-0102-00034  
ind = 823 type Bones fileNamesInd IMG-0102-00033  
ind = 822 type Irrelevant fileNamesInd IMG-0102-00032  
ind = 821 type Bones fileNamesInd IMG-0102-00031  
ind = 820 type Bones fileNamesInd IMG-0102-00030  
ind = 819 type Bones fileNamesInd IMG-0102-00029  
ind = 818 type Bones fileNamesInd IMG-0102-00028  
ind = 817 type Bones fileNamesInd IMG-0102-00027  
ind = 816 type Bones fileNamesInd IMG-0102-00026  
ind = 815 type Bones fileNamesInd IMG-0102-00025  
ind = 814 type Bones fileNamesInd IMG-0102-00024  
ind = 813 type Bones fileNamesInd IMG-0102-00023  
ind = 812 type Bones fileNamesInd IMG-0102-00022  
ind = 811 type Bones fileNamesInd IMG-0102-00021  
ind = 810 type Bones fileNamesInd IMG-0102-00020  
ind = 809 type Bones fileNamesInd IMG-0102-00019  
ind = 808 type Bones fileNamesInd IMG-0102-00018  
ind = 807 type Bones fileNamesInd IMG-0102-00017  
ind = 806 type Bones fileNamesInd IMG-0102-00016  
ind = 805 type Bones fileNamesInd IMG-0102-00015

ind = 804 type Bones fileNamesInd IMG-0102-00014  
 ind = 803 type Bones fileNamesInd IMG-0102-00013  
 ind = 802 type Bones fileNamesInd IMG-0102-00012  
 ind = 801 type Bones fileNamesInd IMG-0102-00011  
 ind = 800 type Bones fileNamesInd IMG-0102-00010  
 ind = 799 type Bones fileNamesInd IMG-0102-00009  
 ind = 798 type Bones fileNamesInd IMG-0102-00008  
 ind = 797 type Bones fileNamesInd IMG-0102-00007  
 ind = 796 type Bones fileNamesInd IMG-0102-00006  
 ind = 795 type Bones fileNamesInd IMG-0102-00005  
 ind = 794 type Bones fileNamesInd IMG-0102-00004  
 ind = 793 type Bones fileNamesInd IMG-0102-00003  
 ind = 792 type Bones fileNamesInd IMG-0102-00002  
 ind = 791 type Bones fileNamesInd IMG-0102-00001  
 ind = 790 type Empty fileNamesInd IMG-0094-00041  
 ind = 789 type Empty fileNamesInd IMG-0094-00040  
 ind = 788 type Empty fileNamesInd IMG-0094-00039  
 ind = 787 type Irrelevant fileNamesInd IMG-0094-00038  
 ind = 786 type Empty fileNamesInd IMG-0094-00037  
 ind = 785 type Bones fileNamesInd IMG-0094-00036  
 ind = 784 type Bones fileNamesInd IMG-0094-00035  
 ind = 783 type Bones fileNamesInd IMG-0094-00034  
 ind = 782 type Bones fileNamesInd IMG-0094-00033  
 ind = 781 type Bones fileNamesInd IMG-0094-00032  
 ind = 780 type Bones fileNamesInd IMG-0094-00031  
 ind = 779 type Bones fileNamesInd IMG-0094-00030  
 ind = 778 type Bones fileNamesInd IMG-0094-00029  
 ind = 777 type Bones fileNamesInd IMG-0094-00028  
 ind = 776 type Bones fileNamesInd IMG-0094-00027  
 ind = 775 type Bones fileNamesInd IMG-0094-00026  
 ind = 774 type Bones fileNamesInd IMG-0094-00025  
 ind = 773 type Bones fileNamesInd IMG-0094-00024  
 ind = 772 type Bones fileNamesInd IMG-0094-00023  
 ind = 771 type Bones fileNamesInd IMG-0094-00022  
 ind = 770 type Bones fileNamesInd IMG-0094-00021  
 ind = 769 type Bones fileNamesInd IMG-0094-00020  
 ind = 768 type Bones fileNamesInd IMG-0094-00019  
 ind = 767 type Bones fileNamesInd IMG-0094-00018  
 ind = 766 type Bones fileNamesInd IMG-0094-00017

```
ind = 765 type Bones fileNamesInd IMG-0094-00016
ind = 764 type Bones fileNamesInd IMG-0094-00015
ind = 763 type Bones fileNamesInd IMG-0094-00014
ind = 762 type Bones fileNamesInd IMG-0094-00013
ind = 761 type Bones fileNamesInd IMG-0094-00012
ind = 760 type Bones fileNamesInd IMG-0094-00011
ind = 759 type Bones fileNamesInd IMG-0094-00010
ind = 758 type Bones fileNamesInd IMG-0094-00009
ind = 757 type Bones fileNamesInd IMG-0094-00008
ind = 756 type Bones fileNamesInd IMG-0094-00007
ind = 755 type Bones fileNamesInd IMG-0094-00006
ind = 754 type Bones fileNamesInd IMG-0094-00005
ind = 753 type Bones fileNamesInd IMG-0094-00004
ind = 752 type Bones fileNamesInd IMG-0094-00003
ind = 751 type Bones fileNamesInd IMG-0094-00002
ind = 750 type Bones fileNamesInd IMG-0094-00001
ind = 749 type Empty fileNamesInd IMG-0093-00041
ind = 748 type Empty fileNamesInd IMG-0093-00040
ind = 747 type Empty fileNamesInd IMG-0093-00039
ind = 746 type Empty fileNamesInd IMG-0093-00038
ind = 745 type Empty fileNamesInd IMG-0093-00037
ind = 744 type Empty fileNamesInd IMG-0093-00036
ind = 743 type Empty fileNamesInd IMG-0093-00035
ind = 742 type Bones fileNamesInd IMG-0093-00034
ind = 741 type Bones fileNamesInd IMG-0093-00033
ind = 740 type Bones fileNamesInd IMG-0093-00032
ind = 739 type Bones fileNamesInd IMG-0093-00031
ind = 738 type Bones fileNamesInd IMG-0093-00030
ind = 737 type Bones fileNamesInd IMG-0093-00029
ind = 736 type GlioblastomaGBM fileNamesInd IMG-0093-00028
ind = 735 type Bones fileNamesInd IMG-0093-00027
ind = 734 type Bones fileNamesInd IMG-0093-00026
ind = 733 type Bones fileNamesInd IMG-0093-00025
ind = 732 type Bones fileNamesInd IMG-0093-00024
ind = 731 type Bones fileNamesInd IMG-0093-00023
ind = 730 type Bones fileNamesInd IMG-0093-00022
ind = 729 type Bones fileNamesInd IMG-0093-00021
ind = 728 type Bones fileNamesInd IMG-0093-00020
ind = 727 type Bones fileNamesInd IMG-0093-00019
```

ind = 726 type Bones fileNamesInd IMG-0093-00018  
ind = 725 type Bones fileNamesInd IMG-0093-00017  
ind = 724 type Bones fileNamesInd IMG-0093-00016  
ind = 723 type Irrelevant fileNamesInd IMG-0093-00015  
ind = 722 type Irrelevant fileNamesInd IMG-0093-00014  
ind = 721 type Empty fileNamesInd IMG-0093-00013  
ind = 720 type Empty fileNamesInd IMG-0093-00012  
ind = 719 type Empty fileNamesInd IMG-0093-00011  
ind = 718 type Empty fileNamesInd IMG-0093-00010  
ind = 717 type Empty fileNamesInd IMG-0093-00009  
ind = 716 type Empty fileNamesInd IMG-0093-00008  
ind = 715 type Empty fileNamesInd IMG-0093-00007  
ind = 714 type Empty fileNamesInd IMG-0093-00006  
ind = 713 type Empty fileNamesInd IMG-0093-00005  
ind = 712 type Irrelevant fileNamesInd IMG-0093-00004  
ind = 711 type Empty fileNamesInd IMG-0093-00003  
ind = 710 type Bones fileNamesInd IMG-0093-00002  
ind = 709 type Empty fileNamesInd IMG-0093-00001  
ind = 708 type Bones fileNamesInd IMG-0092-00041  
ind = 707 type Empty fileNamesInd IMG-0092-00040  
ind = 706 type Empty fileNamesInd IMG-0092-00039  
ind = 705 type Bones fileNamesInd IMG-0092-00038  
ind = 704 type Bones fileNamesInd IMG-0092-00037  
ind = 703 type Bones fileNamesInd IMG-0092-00036  
ind = 702 type Bones fileNamesInd IMG-0092-00035  
ind = 701 type Bones fileNamesInd IMG-0092-00034  
ind = 700 type Bones fileNamesInd IMG-0092-00033  
ind = 699 type Bones fileNamesInd IMG-0092-00032  
ind = 698 type Bones fileNamesInd IMG-0092-00031  
ind = 697 type Bones fileNamesInd IMG-0092-00030  
ind = 696 type Bones fileNamesInd IMG-0092-00029  
ind = 695 type Bones fileNamesInd IMG-0092-00028  
ind = 694 type Bones fileNamesInd IMG-0092-00027  
ind = 693 type Bones fileNamesInd IMG-0092-00026  
ind = 692 type Bones fileNamesInd IMG-0092-00025  
ind = 691 type Bones fileNamesInd IMG-0092-00024  
ind = 690 type Bones fileNamesInd IMG-0092-00023  
ind = 689 type Bones fileNamesInd IMG-0092-00022  
ind = 688 type Bones fileNamesInd IMG-0092-00021

ind = 687 type Bones fileNamesInd IMG-0092-00020  
ind = 686 type Bones fileNamesInd IMG-0092-00019  
ind = 685 type Bones fileNamesInd IMG-0092-00018  
ind = 684 type Bones fileNamesInd IMG-0092-00017  
ind = 683 type Bones fileNamesInd IMG-0092-00016  
ind = 682 type Bones fileNamesInd IMG-0092-00015  
ind = 681 type Bones fileNamesInd IMG-0092-00014  
ind = 680 type Bones fileNamesInd IMG-0092-00013  
ind = 679 type Bones fileNamesInd IMG-0092-00012  
ind = 678 type Bones fileNamesInd IMG-0092-00011  
ind = 677 type Bones fileNamesInd IMG-0092-00010  
ind = 676 type Bones fileNamesInd IMG-0092-00009  
ind = 675 type Bones fileNamesInd IMG-0092-00008  
ind = 674 type Bones fileNamesInd IMG-0092-00007  
ind = 673 type Bones fileNamesInd IMG-0092-00006  
ind = 672 type Bones fileNamesInd IMG-0092-00005  
ind = 671 type Irrelevant fileNamesInd IMG-0092-00004  
ind = 670 type Irrelevant fileNamesInd IMG-0092-00003  
ind = 669 type Empty fileNamesInd IMG-0092-00002  
ind = 668 type Bones fileNamesInd IMG-0092-00001  
ind = 667 type Empty fileNamesInd IMG-0091-00037  
ind = 666 type Empty fileNamesInd IMG-0091-00036  
ind = 665 type Empty fileNamesInd IMG-0091-00035  
ind = 664 type Empty fileNamesInd IMG-0091-00034  
ind = 663 type Irrelevant fileNamesInd IMG-0091-00033  
ind = 662 type Irrelevant fileNamesInd IMG-0091-00032  
ind = 661 type Irrelevant fileNamesInd IMG-0091-00031  
ind = 660 type Irrelevant fileNamesInd IMG-0091-00030  
ind = 659 type Bones fileNamesInd IMG-0091-00029  
ind = 658 type GlioblastomaGBM fileNamesInd IMG-0091-00028  
ind = 657 type GlioblastomaGBM fileNamesInd IMG-0091-00027  
ind = 656 type GlioblastomaGBM fileNamesInd IMG-0091-00026  
ind = 655 type GlioblastomaGBM fileNamesInd IMG-0091-00025  
ind = 654 type GlioblastomaGBM fileNamesInd IMG-0091-00024  
ind = 653 type GlioblastomaGBM fileNamesInd IMG-0091-00023  
ind = 652 type GlioblastomaGBM fileNamesInd IMG-0091-00022  
ind = 651 type Bones fileNamesInd IMG-0091-00021  
ind = 650 type Bones fileNamesInd IMG-0091-00020  
ind = 649 type Bones fileNamesInd IMG-0091-00019

ind = 648 type Bones fileNamesInd IMG-0091-00018  
ind = 647 type Bones fileNamesInd IMG-0091-00017  
ind = 646 type Bones fileNamesInd IMG-0091-00016  
ind = 645 type Bones fileNamesInd IMG-0091-00015  
ind = 644 type Bones fileNamesInd IMG-0091-00014  
ind = 643 type Bones fileNamesInd IMG-0091-00013  
ind = 642 type Bones fileNamesInd IMG-0091-00012  
ind = 641 type Bones fileNamesInd IMG-0091-00011  
ind = 640 type Bones fileNamesInd IMG-0091-00010  
ind = 639 type Irrelevant fileNamesInd IMG-0091-00009  
ind = 638 type Empty fileNamesInd IMG-0091-00008  
ind = 637 type Empty fileNamesInd IMG-0091-00007  
ind = 636 type Empty fileNamesInd IMG-0091-00006  
ind = 635 type Empty fileNamesInd IMG-0091-00005  
ind = 634 type Empty fileNamesInd IMG-0091-00004  
ind = 633 type Empty fileNamesInd IMG-0091-00003  
ind = 632 type Empty fileNamesInd IMG-0091-00002  
ind = 631 type Empty fileNamesInd IMG-0091-00001  
ind = 630 type Empty fileNamesInd IMG-0088-00038  
ind = 629 type Empty fileNamesInd IMG-0088-00037  
ind = 628 type Empty fileNamesInd IMG-0088-00036  
ind = 627 type Empty fileNamesInd IMG-0088-00035  
ind = 626 type Irrelevant fileNamesInd IMG-0088-00034  
ind = 625 type Irrelevant fileNamesInd IMG-0088-00033  
ind = 624 type Irrelevant fileNamesInd IMG-0088-00032  
ind = 623 type Irrelevant fileNamesInd IMG-0088-00031  
ind = 622 type Irrelevant fileNamesInd IMG-0088-00030  
ind = 621 type Normal fileNamesInd IMG-0088-00029  
ind = 620 type Normal fileNamesInd IMG-0088-00028  
ind = 619 type Normal fileNamesInd IMG-0088-00027  
ind = 618 type Normal fileNamesInd IMG-0088-00026  
ind = 617 type Normal fileNamesInd IMG-0088-00025  
ind = 616 type Normal fileNamesInd IMG-0088-00024  
ind = 615 type Normal fileNamesInd IMG-0088-00023  
ind = 614 type Normal fileNamesInd IMG-0088-00022  
ind = 613 type Normal fileNamesInd IMG-0088-00021  
ind = 612 type Normal fileNamesInd IMG-0088-00020  
ind = 611 type Hemorrhage fileNamesInd IMG-0088-00019  
ind = 610 type Hemorrhage fileNamesInd IMG-0088-00018

ind = 609 type Hemorrhage fileNamesInd IMG-0088-00017  
ind = 608 type Bones fileNamesInd IMG-0088-00016  
ind = 607 type Hemorrhage fileNamesInd IMG-0088-00015  
ind = 606 type Hemorrhage fileNamesInd IMG-0088-00014  
ind = 605 type Hemorrhage fileNamesInd IMG-0088-00013  
ind = 604 type Hemorrhage fileNamesInd IMG-0088-00012  
ind = 603 type Hemorrhage fileNamesInd IMG-0088-00011  
ind = 602 type Hemorrhage fileNamesInd IMG-0088-00010  
ind = 601 type Hemorrhage fileNamesInd IMG-0088-00009  
ind = 600 type Hemorrhage fileNamesInd IMG-0088-00008  
ind = 599 type Bones fileNamesInd IMG-0088-00007  
ind = 598 type Hemorrhage fileNamesInd IMG-0088-00006  
ind = 597 type Irrelevant fileNamesInd IMG-0088-00005  
ind = 596 type Hemorrhage fileNamesInd IMG-0088-00004  
ind = 595 type Empty fileNamesInd IMG-0088-00003  
ind = 594 type Empty fileNamesInd IMG-0088-00002  
ind = 593 type Empty fileNamesInd IMG-0088-00001  
ind = 592 type Empty fileNamesInd IMG-0077-00038  
ind = 591 type Empty fileNamesInd IMG-0077-00037  
ind = 590 type Empty fileNamesInd IMG-0077-00036  
ind = 589 type Empty fileNamesInd IMG-0077-00035  
ind = 588 type Bones fileNamesInd IMG-0077-00034  
ind = 587 type Bones fileNamesInd IMG-0077-00033  
ind = 586 type Bones fileNamesInd IMG-0077-00032  
ind = 585 type Bones fileNamesInd IMG-0077-00031  
ind = 584 type Bones fileNamesInd IMG-0077-00030  
ind = 583 type Bones fileNamesInd IMG-0077-00029  
ind = 582 type Bones fileNamesInd IMG-0077-00028  
ind = 581 type Bones fileNamesInd IMG-0077-00027  
ind = 580 type Bones fileNamesInd IMG-0077-00026  
ind = 579 type Bones fileNamesInd IMG-0077-00025  
ind = 578 type Bones fileNamesInd IMG-0077-00024  
ind = 577 type Bones fileNamesInd IMG-0077-00023  
ind = 576 type Bones fileNamesInd IMG-0077-00022  
ind = 575 type Bones fileNamesInd IMG-0077-00021  
ind = 574 type Bones fileNamesInd IMG-0077-00020  
ind = 573 type Bones fileNamesInd IMG-0077-00019  
ind = 572 type Bones fileNamesInd IMG-0077-00018  
ind = 571 type Bones fileNamesInd IMG-0077-00017



```

ind = 570 type Bones fileNamesInd IMG-0077-00016
ind = 569 type Bones fileNamesInd IMG-0077-00015
ind = 568 type Bones fileNamesInd IMG-0077-00014
ind = 567 type Bones fileNamesInd IMG-0077-00013
ind = 566 type Bones fileNamesInd IMG-0077-00012
ind = 565 type Bones fileNamesInd IMG-0077-00011
ind = 564 type Bones fileNamesInd IMG-0077-00010
ind = 563 type Bones fileNamesInd IMG-0077-00009
ind = 562 type Bones fileNamesInd IMG-0077-00008
ind = 561 type Bones fileNamesInd IMG-0077-00007
ind = 560 type Bones fileNamesInd IMG-0077-00006
ind = 559 type Bones fileNamesInd IMG-0077-00005
ind = 558 type Bones fileNamesInd IMG-0077-00004
ind = 557 type Bones fileNamesInd IMG-0077-00003
ind = 556 type Bones fileNamesInd IMG-0077-00002
ind = 555 type Bones fileNamesInd IMG-0077-00001
ind = 554 type Empty fileNamesInd IMG-0055-00036
ind = 553 type Empty fileNamesInd IMG-0055-00035
ind = 552 type Empty fileNamesInd IMG-0055-00034
ind = 551 type Empty fileNamesInd IMG-0055-00033
ind = 550 type Irrelevant fileNamesInd IMG-0055-00032
ind = 549 type Irrelevant fileNamesInd IMG-0055-00031
ind = 548 type Irrelevant fileNamesInd IMG-0055-00030
ind = 547 type Irrelevant fileNamesInd IMG-0055-00029
ind = 546 type GlioblastomaGBM fileNamesInd IMG-0055-00028
ind = 545 type GlioblastomaGBM fileNamesInd IMG-0055-00027
ind = 544 type GlioblastomaGBM fileNamesInd IMG-0055-00026
ind = 543 type GlioblastomaGBM fileNamesInd IMG-0055-00025
ind = 542 type GlioblastomaGBM fileNamesInd IMG-0055-00024
ind = 541 type GlioblastomaGBM fileNamesInd IMG-0055-00023
ind = 540 type GlioblastomaGBM fileNamesInd IMG-0055-00022
ind = 539 type GlioblastomaGBM fileNamesInd IMG-0055-00021
ind = 538 type GlioblastomaGBM fileNamesInd IMG-0055-00020
ind = 537 type GlioblastomaGBM fileNamesInd IMG-0055-00019
ind = 536 type GlioblastomaGBM fileNamesInd IMG-0055-00018
ind = 535 type GlioblastomaGBM fileNamesInd IMG-0055-00017
ind = 534 type GlioblastomaGBM fileNamesInd IMG-0055-00016
ind = 533 type GlioblastomaGBM fileNamesInd IMG-0055-00015
ind = 532 type GlioblastomaGBM fileNamesInd IMG-0055-00014

```

ind = 531 type GlioblastomaGBM fileNamesInd IMG-0055-00013  
ind = 530 type Irrelevant fileNamesInd IMG-0055-00012  
ind = 529 type Irrelevant fileNamesInd IMG-0055-00011  
ind = 528 type Irrelevant fileNamesInd IMG-0055-00010  
ind = 527 type Irrelevant fileNamesInd IMG-0055-00009  
ind = 526 type Irrelevant fileNamesInd IMG-0055-00008  
ind = 525 type Irrelevant fileNamesInd IMG-0055-00007  
ind = 524 type Irrelevant fileNamesInd IMG-0055-00006  
ind = 523 type Irrelevant fileNamesInd IMG-0055-00005  
ind = 522 type Irrelevant fileNamesInd IMG-0055-00004  
ind = 521 type Empty fileNamesInd IMG-0055-00003  
ind = 520 type Empty fileNamesInd IMG-0055-00002  
ind = 519 type Empty fileNamesInd IMG-0055-00001  
ind = 518 type Bones fileNamesInd IMG-0047-00045  
ind = 517 type Bones fileNamesInd IMG-0047-00041  
ind = 516 type Bones fileNamesInd IMG-0047-00040  
ind = 515 type Bones fileNamesInd IMG-0047-00039  
ind = 514 type Bones fileNamesInd IMG-0047-00038  
ind = 513 type Bones fileNamesInd IMG-0047-00037  
ind = 512 type Bones fileNamesInd IMG-0047-00036  
ind = 511 type Bones fileNamesInd IMG-0047-00035  
ind = 510 type Bones fileNamesInd IMG-0047-00034  
ind = 509 type Bones fileNamesInd IMG-0047-00033  
ind = 508 type Bones fileNamesInd IMG-0047-00032  
ind = 507 type Bones fileNamesInd IMG-0047-00031  
ind = 506 type Bones fileNamesInd IMG-0047-00030  
ind = 505 type Bones fileNamesInd IMG-0047-00029  
ind = 504 type Bones fileNamesInd IMG-0047-00028  
ind = 503 type Bones fileNamesInd IMG-0047-00027  
ind = 502 type Bones fileNamesInd IMG-0047-00026  
ind = 501 type Bones fileNamesInd IMG-0047-00025  
ind = 500 type Bones fileNamesInd IMG-0047-00024  
ind = 499 type Bones fileNamesInd IMG-0047-00023  
ind = 498 type Bones fileNamesInd IMG-0047-00022  
ind = 497 type Irrelevant fileNamesInd IMG-0047-00021  
ind = 496 type Irrelevant fileNamesInd IMG-0047-00020  
ind = 495 type Empty fileNamesInd IMG-0047-00019  
ind = 494 type Empty fileNamesInd IMG-0047-00018  
ind = 493 type Empty fileNamesInd IMG-0047-00017

ind = 492 type Irrelevant fileNamesInd IMG-0047-00016  
ind = 491 type Irrelevant fileNamesInd IMG-0047-00015  
ind = 490 type Irrelevant fileNamesInd IMG-0047-00014  
ind = 489 type Empty fileNamesInd IMG-0047-00013  
ind = 488 type Irrelevant fileNamesInd IMG-0047-00012  
ind = 487 type Irrelevant fileNamesInd IMG-0047-00011  
ind = 486 type Irrelevant fileNamesInd IMG-0047-00010  
ind = 485 type Irrelevant fileNamesInd IMG-0047-00009  
ind = 484 type Irrelevant fileNamesInd IMG-0047-00008  
ind = 483 type Empty fileNamesInd IMG-0047-00007  
ind = 482 type Empty fileNamesInd IMG-0047-00006  
ind = 481 type Empty fileNamesInd IMG-0047-00005  
ind = 480 type Empty fileNamesInd IMG-0047-00004  
ind = 479 type Empty fileNamesInd IMG-0047-00003  
ind = 478 type Empty fileNamesInd IMG-0047-00002  
ind = 477 type Empty fileNamesInd IMG-0047-00001  
ind = 476 type Empty fileNamesInd IMG-0044-00035  
ind = 475 type Empty fileNamesInd IMG-0044-00034  
ind = 474 type Empty fileNamesInd IMG-0044-00033  
ind = 473 type Empty fileNamesInd IMG-0044-00032  
ind = 472 type Bones fileNamesInd IMG-0044-00031  
ind = 471 type Bones fileNamesInd IMG-0044-00030  
ind = 470 type Bones fileNamesInd IMG-0044-00029  
ind = 469 type Bones fileNamesInd IMG-0044-00028  
ind = 468 type Bones fileNamesInd IMG-0044-00027  
ind = 467 type Bones fileNamesInd IMG-0044-00026  
ind = 466 type Bones fileNamesInd IMG-0044-00025  
ind = 465 type Bones fileNamesInd IMG-0044-00024  
ind = 464 type Bones fileNamesInd IMG-0044-00023  
ind = 463 type Bones fileNamesInd IMG-0044-00022  
ind = 462 type Bones fileNamesInd IMG-0044-00021  
ind = 461 type Bones fileNamesInd IMG-0044-00020  
ind = 460 type Bones fileNamesInd IMG-0044-00019  
ind = 459 type Bones fileNamesInd IMG-0044-00018  
ind = 458 type Bones fileNamesInd IMG-0044-00017  
ind = 457 type Bones fileNamesInd IMG-0044-00016  
ind = 456 type Bones fileNamesInd IMG-0044-00015  
ind = 455 type Bones fileNamesInd IMG-0044-00014  
ind = 454 type Bones fileNamesInd IMG-0044-00013

```

ind = 453 type Bones fileNamesInd IMG-0044-00012
ind = 452 type Bones fileNamesInd IMG-0044-00011
ind = 451 type Bones fileNamesInd IMG-0044-00010
ind = 450 type Bones fileNamesInd IMG-0044-00009
ind = 449 type Bones fileNamesInd IMG-0044-00008
ind = 448 type Bones fileNamesInd IMG-0044-00007
ind = 447 type Bones fileNamesInd IMG-0044-00006
ind = 446 type Bones fileNamesInd IMG-0044-00005
ind = 445 type Bones fileNamesInd IMG-0044-00004
ind = 444 type Bones fileNamesInd IMG-0044-00003
ind = 443 type Bones fileNamesInd IMG-0044-00002
ind = 442 type Bones fileNamesInd IMG-0044-00001
ind = 441 type Empty fileNamesInd IMG-0043-00035
ind = 440 type Empty fileNamesInd IMG-0043-00034
ind = 439 type Empty fileNamesInd IMG-0043-00033
ind = 438 type Empty fileNamesInd IMG-0043-00032
ind = 437 type Irrelevant fileNamesInd IMG-0043-00031
ind = 436 type Irrelevant fileNamesInd IMG-0043-00030
ind = 435 type Irrelevant fileNamesInd IMG-0043-00029
ind = 434 type Bones fileNamesInd IMG-0043-00028
ind = 433 type GlioblastomaGBM fileNamesInd IMG-0043-00027
ind = 432 type GlioblastomaGBM fileNamesInd IMG-0043-00026
ind = 431 type GlioblastomaGBM fileNamesInd IMG-0043-00025
ind = 430 type GlioblastomaGBM fileNamesInd IMG-0043-00024
ind = 429 type GlioblastomaGBM fileNamesInd IMG-0043-00023
ind = 428 type GlioblastomaGBM fileNamesInd IMG-0043-00022
ind = 427 type GlioblastomaGBM fileNamesInd IMG-0043-00021
ind = 426 type GlioblastomaGBM fileNamesInd IMG-0043-00020
ind = 425 type GlioblastomaGBM fileNamesInd IMG-0043-00019
ind = 424 type GlioblastomaGBM fileNamesInd IMG-0043-00018
ind = 423 type GlioblastomaGBM fileNamesInd IMG-0043-00017
ind = 422 type GlioblastomaGBM fileNamesInd IMG-0043-00016
ind = 421 type GlioblastomaGBM fileNamesInd IMG-0043-00015
ind = 420 type Metastases fileNamesInd IMG-0043-00014
ind = 419 type Bones fileNamesInd IMG-0043-00013
ind = 418 type Bones fileNamesInd IMG-0043-00012
ind = 417 type Bones fileNamesInd IMG-0043-00011
ind = 416 type Metastases fileNamesInd IMG-0043-00010
ind = 415 type Metastases fileNamesInd IMG-0043-00009

```

ind = 414 type Metastases fileNamesInd IMG-0043-00008  
ind = 413 type Irrelevant fileNamesInd IMG-0043-00007  
ind = 412 type Irrelevant fileNamesInd IMG-0043-00006  
ind = 411 type Irrelevant fileNamesInd IMG-0043-00005  
ind = 410 type Irrelevant fileNamesInd IMG-0043-00004  
ind = 409 type Irrelevant fileNamesInd IMG-0043-00003  
ind = 408 type Empty fileNamesInd IMG-0043-00002  
ind = 407 type Irrelevant fileNamesInd IMG-0043-00001  
ind = 406 type Empty fileNamesInd IMG-0010-00048  
ind = 405 type Empty fileNamesInd IMG-0010-00047  
ind = 404 type Empty fileNamesInd IMG-0010-00046  
ind = 403 type Empty fileNamesInd IMG-0010-00045  
ind = 402 type Empty fileNamesInd IMG-0010-00044  
ind = 401 type Bones fileNamesInd IMG-0010-00043  
ind = 400 type Bones fileNamesInd IMG-0010-00042  
ind = 399 type Bones fileNamesInd IMG-0010-00041  
ind = 398 type Bones fileNamesInd IMG-0010-00040  
ind = 397 type Bones fileNamesInd IMG-0010-00039  
ind = 396 type Bones fileNamesInd IMG-0010-00038  
ind = 395 type Bones fileNamesInd IMG-0010-00037  
ind = 394 type Bones fileNamesInd IMG-0010-00036  
ind = 393 type Bones fileNamesInd IMG-0010-00035  
ind = 392 type Bones fileNamesInd IMG-0010-00034  
ind = 391 type Bones fileNamesInd IMG-0010-00033  
ind = 390 type Bones fileNamesInd IMG-0010-00032  
ind = 389 type Bones fileNamesInd IMG-0010-00031  
ind = 388 type Bones fileNamesInd IMG-0010-00030  
ind = 387 type Bones fileNamesInd IMG-0010-00029  
ind = 386 type Bones fileNamesInd IMG-0010-00028  
ind = 385 type Bones fileNamesInd IMG-0010-00027  
ind = 384 type Bones fileNamesInd IMG-0010-00026  
ind = 383 type Bones fileNamesInd IMG-0010-00025  
ind = 382 type Bones fileNamesInd IMG-0010-00024  
ind = 381 type Bones fileNamesInd IMG-0010-00023  
ind = 380 type Bones fileNamesInd IMG-0010-00022  
ind = 379 type Bones fileNamesInd IMG-0010-00021  
ind = 378 type Bones fileNamesInd IMG-0010-00020  
ind = 377 type Bones fileNamesInd IMG-0010-00019  
ind = 376 type Bones fileNamesInd IMG-0010-00018

```
ind = 375 type Bones fileNamesInd IMG-0010-00017
ind = 374 type Bones fileNamesInd IMG-0010-00016
ind = 373 type Bones fileNamesInd IMG-0010-00015
ind = 372 type Bones fileNamesInd IMG-0010-00014
ind = 371 type Bones fileNamesInd IMG-0010-00013
ind = 370 type Bones fileNamesInd IMG-0010-00012
ind = 369 type Bones fileNamesInd IMG-0010-00011
ind = 368 type Bones fileNamesInd IMG-0010-00010
ind = 367 type Bones fileNamesInd IMG-0010-00009
ind = 366 type Bones fileNamesInd IMG-0010-00008
ind = 365 type Bones fileNamesInd IMG-0010-00007
ind = 364 type Bones fileNamesInd IMG-0010-00006
ind = 363 type Bones fileNamesInd IMG-0010-00005
ind = 362 type Bones fileNamesInd IMG-0010-00004
ind = 361 type Bones fileNamesInd IMG-0010-00003
ind = 360 type Bones fileNamesInd IMG-0010-00002
ind = 359 type Bones fileNamesInd IMG-0010-00001
ind = 358 type Empty fileNamesInd IMG-0009-00048
ind = 357 type Empty fileNamesInd IMG-0009-00047
ind = 356 type Empty fileNamesInd IMG-0009-00046
ind = 355 type Empty fileNamesInd IMG-0009-00045
ind = 354 type Empty fileNamesInd IMG-0009-00044
ind = 353 type Irrelevant fileNamesInd IMG-0009-00043
ind = 352 type Irrelevant fileNamesInd IMG-0009-00042
ind = 351 type Bones fileNamesInd IMG-0009-00041
ind = 350 type Bones fileNamesInd IMG-0009-00040
ind = 349 type Bones fileNamesInd IMG-0009-00039
ind = 348 type Bones fileNamesInd IMG-0009-00038
ind = 347 type Bones fileNamesInd IMG-0009-00037
ind = 346 type Bones fileNamesInd IMG-0009-00036
ind = 345 type Bones fileNamesInd IMG-0009-00035
ind = 344 type Bones fileNamesInd IMG-0009-00034
ind = 343 type Bones fileNamesInd IMG-0009-00033
ind = 342 type Bones fileNamesInd IMG-0009-00032
ind = 341 type Bones fileNamesInd IMG-0009-00031
ind = 340 type Bones fileNamesInd IMG-0009-00030
ind = 339 type Bones fileNamesInd IMG-0009-00029
ind = 338 type Metastases fileNamesInd IMG-0009-00028
ind = 337 type Metastases fileNamesInd IMG-0009-00027
```

ind = 336 type Metastases fileNamesInd IMG-0009-00026  
ind = 335 type Metastases fileNamesInd IMG-0009-00025  
ind = 334 type Metastases fileNamesInd IMG-0009-00024  
ind = 333 type Metastases fileNamesInd IMG-0009-00023  
ind = 332 type Metastases fileNamesInd IMG-0009-00022  
ind = 331 type Metastases fileNamesInd IMG-0009-00021  
ind = 330 type Metastases fileNamesInd IMG-0009-00020  
ind = 329 type Irrelevant fileNamesInd IMG-0009-00019  
ind = 328 type Irrelevant fileNamesInd IMG-0009-00018  
ind = 327 type Irrelevant fileNamesInd IMG-0009-00017  
ind = 326 type Irrelevant fileNamesInd IMG-0009-00016  
ind = 325 type Irrelevant fileNamesInd IMG-0009-00015  
ind = 324 type Irrelevant fileNamesInd IMG-0009-00014  
ind = 323 type Irrelevant fileNamesInd IMG-0009-00013  
ind = 322 type Irrelevant fileNamesInd IMG-0009-00012  
ind = 321 type Irrelevant fileNamesInd IMG-0009-00011  
ind = 320 type Irrelevant fileNamesInd IMG-0009-00010  
ind = 319 type Empty fileNamesInd IMG-0009-00009  
ind = 318 type Irrelevant fileNamesInd IMG-0009-00008  
ind = 317 type Irrelevant fileNamesInd IMG-0009-00007  
ind = 316 type Irrelevant fileNamesInd IMG-0009-00006  
ind = 315 type Irrelevant fileNamesInd IMG-0009-00005  
ind = 314 type Irrelevant fileNamesInd IMG-0009-00004  
ind = 313 type Irrelevant fileNamesInd IMG-0009-00003  
ind = 312 type Irrelevant fileNamesInd IMG-0009-00002  
ind = 311 type Irrelevant fileNamesInd IMG-0009-00001  
ind = 310 type Empty fileNamesInd IMG-0008-00052  
ind = 309 type Empty fileNamesInd IMG-0008-00051  
ind = 308 type Empty fileNamesInd IMG-0008-00050  
ind = 307 type Empty fileNamesInd IMG-0008-00049  
ind = 306 type Bones fileNamesInd IMG-0008-00048  
ind = 305 type Bones fileNamesInd IMG-0008-00047  
ind = 304 type Bones fileNamesInd IMG-0008-00046  
ind = 303 type Bones fileNamesInd IMG-0008-00045  
ind = 302 type Bones fileNamesInd IMG-0008-00044  
ind = 301 type Bones fileNamesInd IMG-0008-00043  
ind = 300 type Bones fileNamesInd IMG-0008-00042  
ind = 299 type Bones fileNamesInd IMG-0008-00041  
ind = 298 type Bones fileNamesInd IMG-0008-00040

```
ind = 297 type Bones fileNamesInd IMG-0008-00039
ind = 296 type Bones fileNamesInd IMG-0008-00038
ind = 295 type Bones fileNamesInd IMG-0008-00037
ind = 294 type Bones fileNamesInd IMG-0008-00036
ind = 293 type Bones fileNamesInd IMG-0008-00035
ind = 292 type Bones fileNamesInd IMG-0008-00034
ind = 291 type Bones fileNamesInd IMG-0008-00033
ind = 290 type Bones fileNamesInd IMG-0008-00032
ind = 289 type Bones fileNamesInd IMG-0008-00031
ind = 288 type Bones fileNamesInd IMG-0008-00030
ind = 287 type Bones fileNamesInd IMG-0008-00029
ind = 286 type Bones fileNamesInd IMG-0008-00028
ind = 285 type Bones fileNamesInd IMG-0008-00027
ind = 284 type Bones fileNamesInd IMG-0008-00026
ind = 283 type Bones fileNamesInd IMG-0008-00025
ind = 282 type Bones fileNamesInd IMG-0008-00024
ind = 281 type Bones fileNamesInd IMG-0008-00023
ind = 280 type Bones fileNamesInd IMG-0008-00022
ind = 279 type Bones fileNamesInd IMG-0008-00021
ind = 278 type Bones fileNamesInd IMG-0008-00020
ind = 277 type Bones fileNamesInd IMG-0008-00019
ind = 276 type Bones fileNamesInd IMG-0008-00018
ind = 275 type Bones fileNamesInd IMG-0008-00017
ind = 274 type Bones fileNamesInd IMG-0008-00016
ind = 273 type Bones fileNamesInd IMG-0008-00015
ind = 272 type Bones fileNamesInd IMG-0008-00014
ind = 271 type Bones fileNamesInd IMG-0008-00013
ind = 270 type Bones fileNamesInd IMG-0008-00012
ind = 269 type Bones fileNamesInd IMG-0008-00011
ind = 268 type Bones fileNamesInd IMG-0008-00010
ind = 267 type Bones fileNamesInd IMG-0008-00009
ind = 266 type Bones fileNamesInd IMG-0008-00008
ind = 265 type Bones fileNamesInd IMG-0008-00007
ind = 264 type Bones fileNamesInd IMG-0008-00006
ind = 263 type Bones fileNamesInd IMG-0008-00005
ind = 262 type Empty fileNamesInd IMG-0008-00004
ind = 261 type Empty fileNamesInd IMG-0008-00003
ind = 260 type Empty fileNamesInd IMG-0008-00002
ind = 259 type Empty fileNamesInd IMG-0008-00001
```



ind = 258 type Empty fileNamesInd IMG-0007-00052  
ind = 257 type Empty fileNamesInd IMG-0007-00051  
ind = 256 type Empty fileNamesInd IMG-0007-00050  
ind = 255 type Empty fileNamesInd IMG-0007-00049  
ind = 254 type Empty fileNamesInd IMG-0007-00048  
ind = 253 type Empty fileNamesInd IMG-0007-00047  
ind = 252 type Empty fileNamesInd IMG-0007-00046  
ind = 251 type Bones fileNamesInd IMG-0007-00044  
ind = 250 type Bones fileNamesInd IMG-0007-00043  
ind = 249 type Bones fileNamesInd IMG-0007-00042  
ind = 248 type Empty fileNamesInd IMG-0007-00034  
ind = 247 type Empty fileNamesInd IMG-0007-00033  
ind = 246 type Empty fileNamesInd IMG-0007-00032  
ind = 245 type Irrelevant fileNamesInd IMG-0007-00031  
ind = 244 type Irrelevant fileNamesInd IMG-0007-00030  
ind = 243 type Irrelevant fileNamesInd IMG-0007-00029  
ind = 242 type Irrelevant fileNamesInd IMG-0007-00028  
ind = 241 type Bones fileNamesInd IMG-0007-00027  
ind = 240 type Normal fileNamesInd IMG-0007-00026  
ind = 239 type Normal fileNamesInd IMG-0007-00025  
ind = 238 type Normal fileNamesInd IMG-0007-00024  
ind = 237 type Normal fileNamesInd IMG-0007-00023  
ind = 236 type Normal fileNamesInd IMG-0007-00022  
ind = 235 type Normal fileNamesInd IMG-0007-00021  
ind = 234 type Normal fileNamesInd IMG-0007-00020  
ind = 233 type Normal fileNamesInd IMG-0007-00019  
ind = 232 type Normal fileNamesInd IMG-0007-00018  
ind = 231 type Normal fileNamesInd IMG-0007-00017  
ind = 230 type Normal fileNamesInd IMG-0007-00016  
ind = 229 type Normal fileNamesInd IMG-0007-00015  
ind = 228 type Metastases fileNamesInd IMG-0007-00014  
ind = 227 type Metastases fileNamesInd IMG-0007-00013  
ind = 226 type Metastases fileNamesInd IMG-0007-00012  
ind = 225 type Metastases fileNamesInd IMG-0007-00011  
ind = 224 type Metastases fileNamesInd IMG-0007-00010  
ind = 223 type Metastases fileNamesInd IMG-0007-00009  
ind = 222 type Irrelevant fileNamesInd IMG-0007-00008  
ind = 221 type Irrelevant fileNamesInd IMG-0007-00007  
ind = 220 type Irrelevant fileNamesInd IMG-0007-00006

ind = 219 type Irrelevant fileNamesInd IMG-0007-00005  
ind = 218 type Irrelevant fileNamesInd IMG-0007-00004  
ind = 217 type Irrelevant fileNamesInd IMG-0007-00003  
ind = 216 type Irrelevant fileNamesInd IMG-0007-00002  
ind = 215 type Irrelevant fileNamesInd IMG-0007-00001  
ind = 214 type Empty fileNamesInd IMG-0006-00031  
ind = 213 type Empty fileNamesInd IMG-0006-00030  
ind = 212 type Empty fileNamesInd IMG-0006-00029  
ind = 211 type Irrelevant fileNamesInd IMG-0006-00028  
ind = 210 type Irrelevant fileNamesInd IMG-0006-00027  
ind = 209 type Irrelevant fileNamesInd IMG-0006-00026  
ind = 208 type Bones fileNamesInd IMG-0006-00025  
ind = 207 type Bones fileNamesInd IMG-0006-00024  
ind = 206 type Bones fileNamesInd IMG-0006-00023  
ind = 205 type Bones fileNamesInd IMG-0006-00022  
ind = 204 type Bones fileNamesInd IMG-0006-00021  
ind = 203 type PleomorphicPXA fileNamesInd IMG-0006-00020  
ind = 202 type PleomorphicPXA fileNamesInd IMG-0006-00019  
ind = 201 type PleomorphicPXA fileNamesInd IMG-0006-00018  
ind = 200 type Bones fileNamesInd IMG-0006-00017  
ind = 199 type Bones fileNamesInd IMG-0006-00016  
ind = 198 type Bones fileNamesInd IMG-0006-00015  
ind = 197 type Bones fileNamesInd IMG-0006-00014  
ind = 196 type Bones fileNamesInd IMG-0006-00013  
ind = 195 type Bones fileNamesInd IMG-0006-00012  
ind = 194 type Bones fileNamesInd IMG-0006-00011  
ind = 193 type Bones fileNamesInd IMG-0006-00010  
ind = 192 type Bones fileNamesInd IMG-0006-00009  
ind = 191 type Bones fileNamesInd IMG-0006-00008  
ind = 190 type Bones fileNamesInd IMG-0006-00007  
ind = 189 type Bones fileNamesInd IMG-0006-00006  
ind = 188 type Bones fileNamesInd IMG-0006-00005  
ind = 187 type Bones fileNamesInd IMG-0006-00004  
ind = 186 type Irrelevant fileNamesInd IMG-0006-00003  
ind = 185 type Irrelevant fileNamesInd IMG-0006-00002  
ind = 184 type Empty fileNamesInd IMG-0006-00001  
ind = 183 type Empty fileNamesInd IMG-0005-00031  
ind = 182 type Empty fileNamesInd IMG-0005-00030  
ind = 181 type Empty fileNamesInd IMG-0005-00029

```

ind = 180 type Irrelevant fileNamesInd IMG-0005-00028
ind = 179 type Irrelevant fileNamesInd IMG-0005-00027
ind = 178 type Irrelevant fileNamesInd IMG-0005-00026
ind = 177 type Irrelevant fileNamesInd IMG-0005-00025
ind = 176 type Bones fileNamesInd IMG-0005-00024
ind = 175 type Bones fileNamesInd IMG-0005-00023
ind = 174 type GlioblastomaGBM fileNamesInd IMG-0005-00022
ind = 173 type PleomorphicPXA fileNamesInd IMG-0005-00021
ind = 172 type PleomorphicPXA fileNamesInd IMG-0005-00020
ind = 171 type PleomorphicPXA fileNamesInd IMG-0005-00019
ind = 170 type PleomorphicPXA fileNamesInd IMG-0005-00018
ind = 169 type PleomorphicPXA fileNamesInd IMG-0005-00017
ind = 168 type PleomorphicPXA fileNamesInd IMG-0005-00016
ind = 167 type PleomorphicPXA fileNamesInd IMG-0005-00015
ind = 166 type PleomorphicPXA fileNamesInd IMG-0005-00014
ind = 165 type PleomorphicPXA fileNamesInd IMG-0005-00013
ind = 164 type PleomorphicPXA fileNamesInd IMG-0005-00012
ind = 163 type PleomorphicPXA fileNamesInd IMG-0005-00011
ind = 162 type GlioblastomaGBM fileNamesInd IMG-0005-00010
ind = 161 type GlioblastomaGBM fileNamesInd IMG-0005-00009

```

... DeleteFile: I/O operation is not valid for IMG-0005-00008.png.

```

ind = 160 type GlioblastomaGBM fileNamesInd IMG-0005-00008
ind = 159 type Metastases fileNamesInd IMG-0005-00007
ind = 158 type Metastases fileNamesInd IMG-0005-00006
ind = 157 type Irrelevant fileNamesInd IMG-0005-00005
ind = 156 type Irrelevant fileNamesInd IMG-0005-00004
ind = 155 type Irrelevant fileNamesInd IMG-0005-00003
ind = 154 type Irrelevant fileNamesInd IMG-0005-00002
ind = 153 type Empty fileNamesInd IMG-0005-00001
ind = 152 type Empty fileNamesInd IMG-0004-00036
ind = 151 type Empty fileNamesInd IMG-0004-00035
ind = 150 type Empty fileNamesInd IMG-0004-00034
ind = 149 type Irrelevant fileNamesInd IMG-0004-00033
ind = 148 type Irrelevant fileNamesInd IMG-0004-00032
ind = 147 type Irrelevant fileNamesInd IMG-0004-00031
ind = 146 type Irrelevant fileNamesInd IMG-0004-00030
ind = 145 type Bones fileNamesInd IMG-0004-00029
ind = 144 type GlioblastomaGBM fileNamesInd IMG-0004-00028
ind = 143 type GlioblastomaGBM fileNamesInd IMG-0004-00027

```

```

ind = 142 type GlioblastomaGBM fileNamesInd IMG-0004-00026
ind = 141 type GlioblastomaGBM fileNamesInd IMG-0004-00025
ind = 140 type GlioblastomaGBM fileNamesInd IMG-0004-00024
ind = 139 type GlioblastomaGBM fileNamesInd IMG-0004-00023
ind = 138 type GlioblastomaGBM fileNamesInd IMG-0004-00022
ind = 137 type GlioblastomaGBM fileNamesInd IMG-0004-00021
ind = 136 type GlioblastomaGBM fileNamesInd IMG-0004-00020
ind = 135 type GlioblastomaGBM fileNamesInd IMG-0004-00019
ind = 134 type GlioblastomaGBM fileNamesInd IMG-0004-00018
ind = 133 type GlioblastomaGBM fileNamesInd IMG-0004-00017
ind = 132 type Bones fileNamesInd IMG-0004-00016
ind = 131 type Bones fileNamesInd IMG-0004-00015
ind = 130 type Bones fileNamesInd IMG-0004-00014
ind = 129 type Bones fileNamesInd IMG-0004-00013
ind = 128 type Bones fileNamesInd IMG-0004-00012
ind = 127 type Bones fileNamesInd IMG-0004-00011
ind = 126 type Bones fileNamesInd IMG-0004-00010
ind = 125 type Bones fileNamesInd IMG-0004-00009
ind = 124 type Bones fileNamesInd IMG-0004-00008
ind = 123 type Bones fileNamesInd IMG-0004-00007
ind = 122 type Bones fileNamesInd IMG-0004-00006
ind = 121 type Bones fileNamesInd IMG-0004-00005
ind = 120 type Bones fileNamesInd IMG-0004-00004
ind = 119 type Bones fileNamesInd IMG-0004-00003
ind = 118 type Bones fileNamesInd IMG-0004-00002
ind = 117 type Irrelevant fileNamesInd IMG-0004-00001
ind = 116 type Empty fileNamesInd IMG-0003-00038
ind = 115 type Empty fileNamesInd IMG-0003-00037
ind = 114 type Empty fileNamesInd IMG-0003-00036
ind = 113 type Irrelevant fileNamesInd IMG-0003-00035
ind = 112 type Irrelevant fileNamesInd IMG-0003-00034
ind = 111 type Irrelevant fileNamesInd IMG-0003-00033
ind = 110 type Bones fileNamesInd IMG-0003-00032
ind = 109 type Bones fileNamesInd IMG-0003-00031
ind = 108 type Bones fileNamesInd IMG-0003-00030
ind = 107 type Bones fileNamesInd IMG-0003-00029
ind = 106 type Bones fileNamesInd IMG-0003-00028
ind = 105 type Bones fileNamesInd IMG-0003-00027
ind = 104 type Bones fileNamesInd IMG-0003-00026

```

ind = 103 type Bones fileNamesInd IMG-0003-00025  
 ind = 102 type Bones fileNamesInd IMG-0003-00024  
 ind = 101 type Bones fileNamesInd IMG-0003-00023  
 ind = 100 type Bones fileNamesInd IMG-0003-00022  
 ind = 99 type Bones fileNamesInd IMG-0003-00021  
 ind = 98 type Bones fileNamesInd IMG-0003-00020  
 ind = 97 type Bones fileNamesInd IMG-0003-00019  
 ind = 96 type Bones fileNamesInd IMG-0003-00018  
 ind = 95 type Normal fileNamesInd IMG-0003-00017  
 ind = 94 type Normal fileNamesInd IMG-0003-00016  
 ind = 93 type Normal fileNamesInd IMG-0003-00015  
 ind = 92 type Metastases fileNamesInd IMG-0003-00014  
 ind = 91 type Metastases fileNamesInd IMG-0003-00013  
 ind = 90 type Irrelevant fileNamesInd IMG-0003-00012  
 ind = 89 type Irrelevant fileNamesInd IMG-0003-00011  
 ind = 88 type Irrelevant fileNamesInd IMG-0003-00010  
 ind = 87 type Irrelevant fileNamesInd IMG-0003-00009  
 ind = 86 type Irrelevant fileNamesInd IMG-0003-00008  
 ind = 85 type Irrelevant fileNamesInd IMG-0003-00007  
 ind = 84 type Irrelevant fileNamesInd IMG-0003-00006  
 ind = 83 type Irrelevant fileNamesInd IMG-0003-00005  
 ind = 82 type Irrelevant fileNamesInd IMG-0003-00004  
 ind = 81 type Irrelevant fileNamesInd IMG-0003-00003  
 ind = 80 type Irrelevant fileNamesInd IMG-0003-00002  
 ind = 79 type Irrelevant fileNamesInd IMG-0003-00001  
 ind = 78 type Empty fileNamesInd IMG-0002-00039  
 ind = 77 type Empty fileNamesInd IMG-0002-00038  
 ind = 76 type Empty fileNamesInd IMG-0002-00037  
 ind = 75 type Irrelevant fileNamesInd IMG-0002-00036  
 ind = 74 type Irrelevant fileNamesInd IMG-0002-00035  
 ind = 73 type Irrelevant fileNamesInd IMG-0002-00034  
 ind = 72 type Bones fileNamesInd IMG-0002-00033  
 ind = 71 type Bones fileNamesInd IMG-0002-00032  
 ind = 70 type Bones fileNamesInd IMG-0002-00031  
 ind = 69 type Bones fileNamesInd IMG-0002-00030  
 ind = 68 type Bones fileNamesInd IMG-0002-00029  
 ind = 67 type Bones fileNamesInd IMG-0002-00028  
 ind = 66 type Bones fileNamesInd IMG-0002-00027  
 ind = 65 type Bones fileNamesInd IMG-0002-00026

```
ind = 64 type Bones fileNamesInd IMG-0002-00025
ind = 63 type Bones fileNamesInd IMG-0002-00024
ind = 62 type Bones fileNamesInd IMG-0002-00023
ind = 61 type Bones fileNamesInd IMG-0002-00022
ind = 60 type Bones fileNamesInd IMG-0002-00021
ind = 59 type Bones fileNamesInd IMG-0002-00020
ind = 58 type Bones fileNamesInd IMG-0002-00019
ind = 57 type Bones fileNamesInd IMG-0002-00018
ind = 56 type Bones fileNamesInd IMG-0002-00017
ind = 55 type Bones fileNamesInd IMG-0002-00016
ind = 54 type Bones fileNamesInd IMG-0002-00015
ind = 53 type Bones fileNamesInd IMG-0002-00014
ind = 52 type Bones fileNamesInd IMG-0002-00013
ind = 51 type Bones fileNamesInd IMG-0002-00012
ind = 50 type Bones fileNamesInd IMG-0002-00011
ind = 49 type Bones fileNamesInd IMG-0002-00010
ind = 48 type Bones fileNamesInd IMG-0002-00009
ind = 47 type Bones fileNamesInd IMG-0002-00008
ind = 46 type Bones fileNamesInd IMG-0002-00007
ind = 45 type Bones fileNamesInd IMG-0002-00006
ind = 44 type Bones fileNamesInd IMG-0002-00005
ind = 43 type Bones fileNamesInd IMG-0002-00004
ind = 42 type Bones fileNamesInd IMG-0002-00003
ind = 41 type Bones fileNamesInd IMG-0002-00002
ind = 40 type Bones fileNamesInd IMG-0002-00001
ind = 39 type Empty fileNamesInd IMG-0001-00039
ind = 38 type Empty fileNamesInd IMG-0001-00038
ind = 37 type Empty fileNamesInd IMG-0001-00037
ind = 36 type Empty fileNamesInd IMG-0001-00036
ind = 35 type Irrelevant fileNamesInd IMG-0001-00035
ind = 34 type Irrelevant fileNamesInd IMG-0001-00034
ind = 33 type Irrelevant fileNamesInd IMG-0001-00033
ind = 32 type Bones fileNamesInd IMG-0001-00032
ind = 31 type Bones fileNamesInd IMG-0001-00031
ind = 30 type GlioblastomaGBM fileNamesInd IMG-0001-00030
ind = 29 type GlioblastomaGBM fileNamesInd IMG-0001-00029
ind = 28 type GlioblastomaGBM fileNamesInd IMG-0001-00028
ind = 27 type GlioblastomaGBM fileNamesInd IMG-0001-00027
ind = 26 type GlioblastomaGBM fileNamesInd IMG-0001-00026
```

```

ind = 25 type GlioblastomaGBM fileNamesInd IMG-0001-00025
ind = 24 type GlioblastomaGBM fileNamesInd IMG-0001-00024
ind = 23 type GlioblastomaGBM fileNamesInd IMG-0001-00023
ind = 22 type GlioblastomaGBM fileNamesInd IMG-0001-00022
ind = 21 type GlioblastomaGBM fileNamesInd IMG-0001-00021
ind = 20 type GlioblastomaGBM fileNamesInd IMG-0001-00020
ind = 19 type GlioblastomaGBM fileNamesInd IMG-0001-00019
ind = 18 type GlioblastomaGBM fileNamesInd IMG-0001-00018
ind = 17 type GlioblastomaGBM fileNamesInd IMG-0001-00017
ind = 16 type Metastases fileNamesInd IMG-0001-00016
ind = 15 type Metastases fileNamesInd IMG-0001-00015
ind = 14 type Metastases fileNamesInd IMG-0001-00014
ind = 13 type Metastases fileNamesInd IMG-0001-00013
ind = 12 type Irrelevant fileNamesInd IMG-0001-00012
ind = 11 type Irrelevant fileNamesInd IMG-0001-00011
ind = 10 type Irrelevant fileNamesInd IMG-0001-00010
ind = 9 type Irrelevant fileNamesInd IMG-0001-00009
ind = 8 type Irrelevant fileNamesInd IMG-0001-00008
ind = 7 type Irrelevant fileNamesInd IMG-0001-00007
ind = 6 type Irrelevant fileNamesInd IMG-0001-00006
ind = 5 type Irrelevant fileNamesInd IMG-0001-00005
ind = 4 type Irrelevant fileNamesInd IMG-0001-00004
ind = 3 type Irrelevant fileNamesInd IMG-0001-00003
ind = 2 type Irrelevant fileNamesInd IMG-0001-00002
ind = 1 type Irrelevant fileNamesInd IMG-0001-00001

```

```

In[ ]:= t2 = TimeUsed[];
tTotal = t2 - t1

```

```

Out[ ]:=
298.532

```
