# Supplementary material for: Machine Learning Application to Brain Diseases Detection
Source: Preprints.org preprint supplement (doi:10.20944/preprints202311.1127.v1), 2023-11-17
Supplement: Supplementary file 4 [file supplementary]

```

mainDir = SetDirectory[NotebookDirectory[]];

dNa = 10902; dNb = 11782; dNc = 11034; dNd = 11179;
dNe = 11901; dNf = 12523; dNg = 13199;
dNh = 11064; dNk = 11216;
dN0 = dNa + dNb + dNc + dNd + dNe + dNf + dNg + dNh + dNk;
dEa = 9164; dEb = 9086; dEc = 9999; dEd = 9048;
dEe = 8860; dEf = 9350; dEg = 8943; dEh = 8891;
dEk = 8898; dEm = 10253; dEn = 10089; dEp = 10233; dEr = 12539; dEs = 11321;
dEt = 8412; dEu = 8791; dEv = 9280; dEy = 9028;
dE0 = dEa + dEb + dEc + dEd + dEe + dEf +
      dEg + dEh + dEk + dEm + dEn + dEp + dEr + dEt + dEu + dEv + dEy;
dBa = 10140; dBb = 8745; dBc = 9994; dB0 = dBa + dBb + dBc;
dVa = 10192; dVb = 9184; dVc = 10418; dV0 = dVa + dVb + dVc;
dTa = 10187; dTb = 9283; dT0 = dTa + dTb;
dSa = 11583; dS0 = dSa + 0;
fileNamesNothing = StringTake[FileNames["N9999/" <> "*.png"], {9, -5}];
fileNamesTeeth = StringTake[FileNames["T9999/" <> "*.png"], {9, -5}];
fileNamesBones = StringTake[FileNames["B9999/" <> "*.png"], {7, -5}];
fileNamesEmpty = StringTake[FileNames["E9999/" <> "*.png"], {7, -5}];
fileNamesSomething = StringTake[FileNames["S9999/" <> "*.png"], {11, -5}];
fileNamesVisible = StringTake[FileNames["V9999/" <> "*.png"], {9, -5}];
fileNames12345 = Join[fileNamesNothing, fileNamesTeeth,
      fileNamesBones, fileNamesEmpty, fileNamesSomething, fileNamesVisible];

dSVE = dV0 + dN0 + dE0 + dB0 + dT0 + dS0 + Dimensions[fileNames12345][[1]];
Print["Total Visible = ", Dimensions[fileNamesVisible][[1]] + dV0,
      " % ", 100. (Dimensions[fileNamesVisible][[1]] + dV0) / dSVE]
Print["Total Something = ", Dimensions[fileNamesBones][[1]] + dB0,
      " % ", 100. (Dimensions[fileNamesBones][[1]] + dB0) / dSVE]
Print["Total Bones = ", Dimensions[fileNamesTeeth][[1]] + dT0,
      " % ", 100. (Dimensions[fileNamesTeeth][[1]] + dT0) / dSVE]
Print["Total Empty = ", Dimensions[fileNamesEmpty][[1]] + dE0,
      " % ", 100. (Dimensions[fileNamesEmpty][[1]] + dE0) / dSVE]
Print["Total Nothing = ", Dimensions[fileNamesNothing][[1]] + dN0,
      " % ", 100. (Dimensions[fileNamesNothing][[1]] + dN0) / dSVE]
Print["Total Something = ", Dimensions[fileNamesSomething][[1]] + dS0,
      " % ", 100. (Dimensions[fileNamesSomething][[1]] + dS0) / dSVE]
Print[" -----"];
Print["Total ALL = ", dSVE]

Total Visible = 40228 % 10.1077
Total Something = 38538 % 9.68306
Total Bones = 42074 % 10.5715
Total Empty = 168174 % 42.2554
Total Nothing = 108980 % 27.3823

-----
Total ALL = 397994

```
