# Supplementary material for: Machine Learning Application to Brain Diseases Detection
Source: Preprints.org preprint supplement (doi:10.20944/preprints202311.1127.v1), 2023-11-17
Supplement: Supplementary file 5 [file supplementary]

```
In[1]:= mainDir = SetDirectory[NotebookDirectory[]];  
      << swKnowledgeSVM10`
```

```
In[3]:= Clear[fileNames, dataImg]  
      fileNames = StringTake[FileNames["*.png"], {1, -5}]  
      i = 5;  
      norm1 = 4;  
      file = fileNames[[i]] <> ".png";  
      dataImg = Import[file, "Data"];  
      union = Union[Flatten[Flatten[Round[dataImg / norm1]]]];  
      {Min[union], Max[union]}
```

```
Out[4]= {01-IMG-0007-00026, 02-IMG-0002-00001,  
      03-IMG-0001-00001, 04-ID_b052ca590, 05-ID_64d95ae3a}
```

```
Out[10]=  
      {24, 3341}
```

```

In[11]:= sortList = Sort[Flatten[Flatten[Round[dataImg / norm1]]]];
uDataImg = Union[Flatten[Flatten[Round[dataImg / norm1]]]];
Dimensions[uDataImg]
pairsSortList = Tally[sortList];
p0 = pairsSortList[[1]]
p1 = Delete[pairsSortList, {1}];
p1 = Delete[p1, {-1}];
img1a = ListPlot[p1, Joined → {True},
  AxesLabel → {Text[Style[" pixel\n value", Medium]], Text[Style["# pixels", Medium]]},
  Filling → Axis, PlotRange → {All, {0, 2000}}]
img1b = ListPlot[p1, Joined → {True},
  AxesLabel → {Text[Style[" pixel\n value", Medium]], Text[Style["# pixels", Medium]]},
  Filling → Axis, PlotRange → {{1, 2000}, {0, 2000}}]

```

Out[13]=

{830}

Out[15]=

{24, 9}

Out[18]=

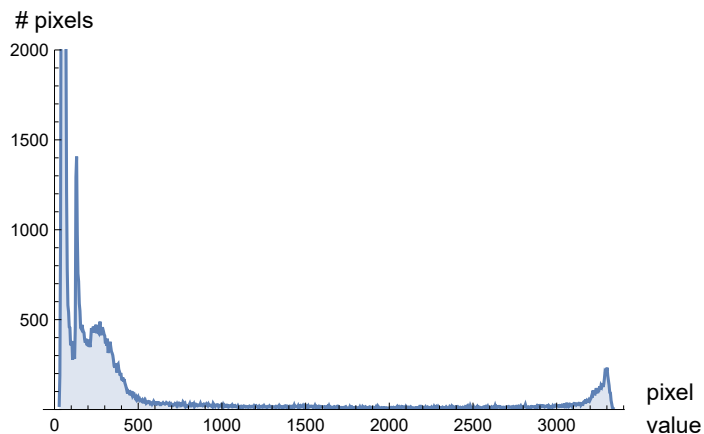

Out[19]=

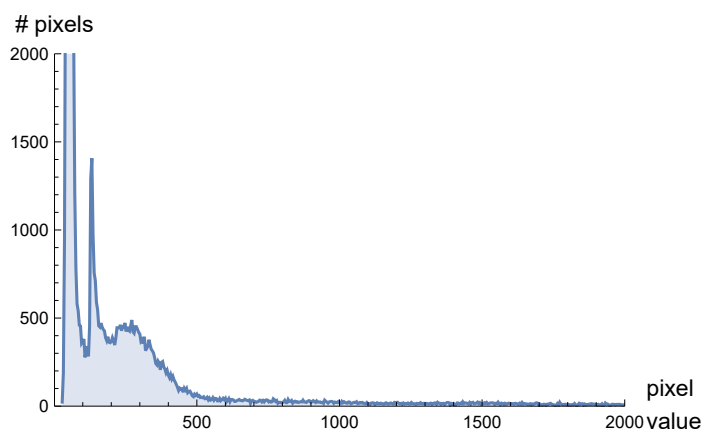

```

In[20]:= << swKnowledgeSVM10f`
normDataImg2 = dataImg;
minNormDataImg = 50;
maxNormDataImg = 1000;

```

```
In[24]:= manipulateHPlotFramedX1X2[normDataImg2]  
Out[24]=
```

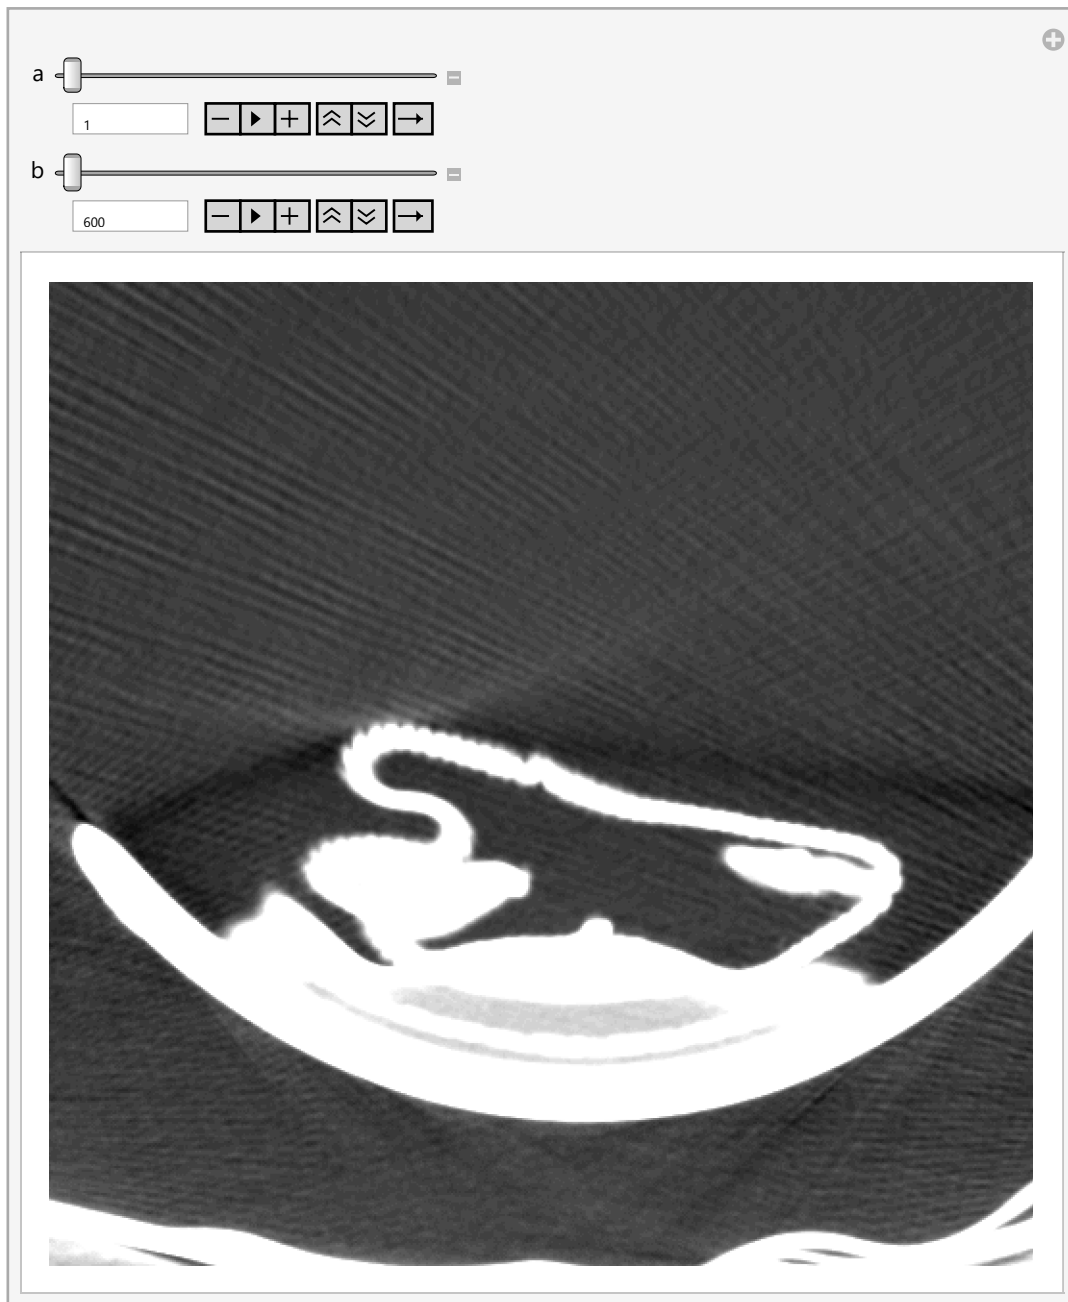

```
In[25]:= img2 = ImageAdjust[Image[normDataImg2]]  
Out[25]=
```

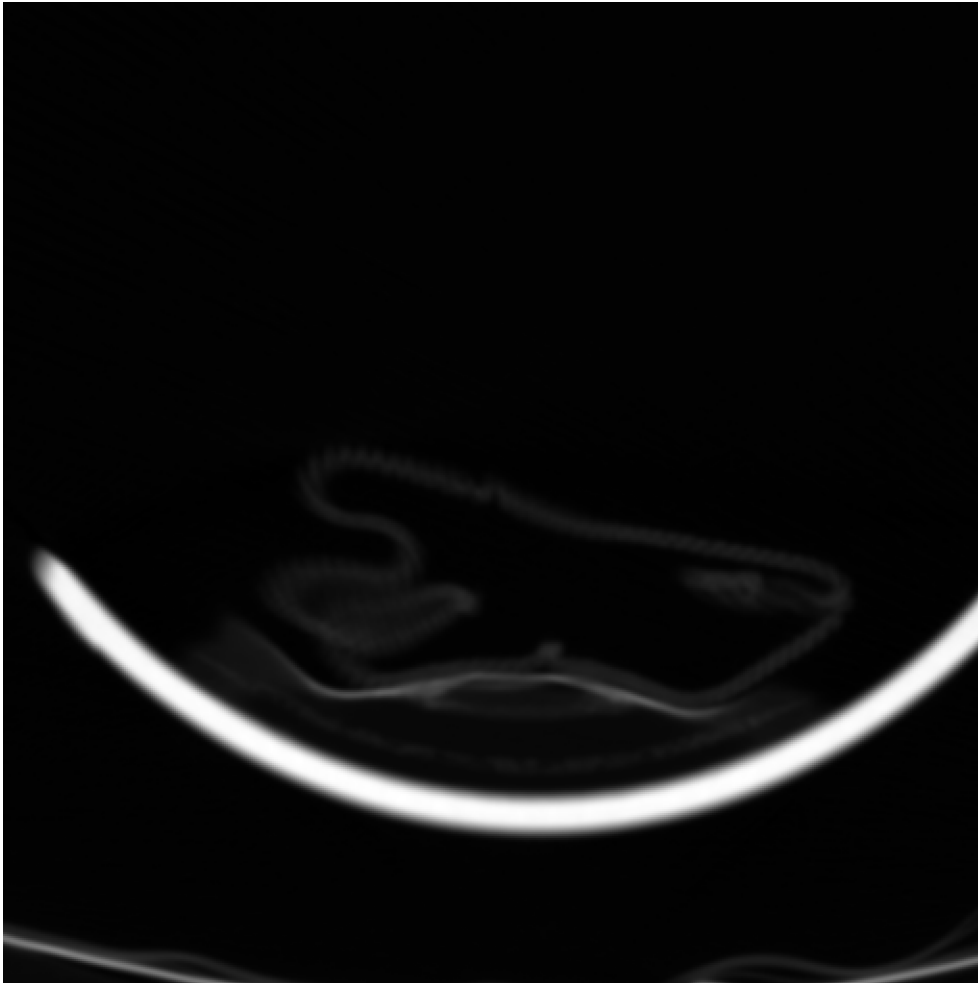

In[26]:= **img1 =**

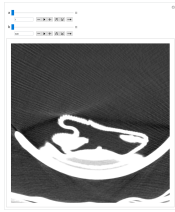

Out[26]=

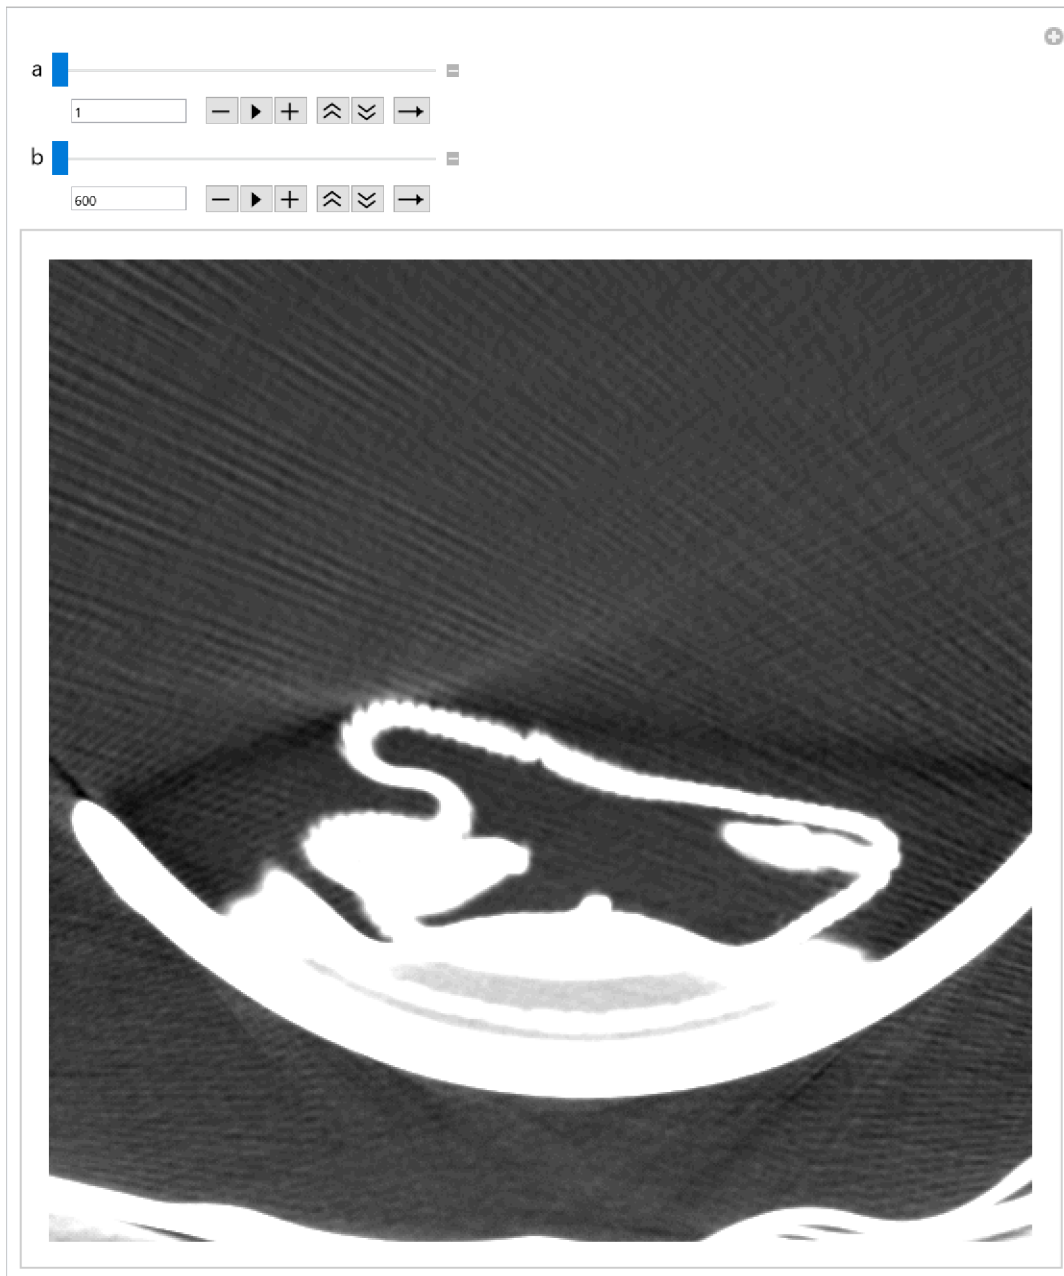

```
In[27]:= (*
Export["D2fig012a.tif",img1,ImageResolution->300];
Export["D2fig012b.tif",img2,ImageResolution->300];
*)
```
