# Supplementary material for: Machine Learning Application to Brain Diseases Detection
Source: Preprints.org preprint supplement (doi:10.20944/preprints202311.1127.v1), 2023-11-17
Supplement: Supplementary file 6 [file supplementary]

```
In[1]:= mainDir = SetDirectory[NotebookDirectory[]];
```

```
In[2]:= Clear[fileNames, dataImg]  
fileNames = StringTake[FileNames["*.png"], {1, -5}]  
iMax = Length[fileNames]
```

```
Out[3]= {imgB01, imgB02, imgB03, imgB04, imgB05, imgB06, imgE01, imgE02,  
imgE03, imgE04, imgE05, imgN01, imgN02, imgN03, imgN04, imgN05, imgS01,  
imgS02, imgS03, imgS04, imgS05, imgV01, imgV02, imgV03, imgV04, imgV05}
```

```
Out[4]= 26
```

```
In[5]:= img1 = Import[fileNames[[1]] <> ".png"];  
img2 = Import[fileNames[[2]] <> ".png"];  
img3 = Import[fileNames[[3]] <> ".png"];  
img4 = Import[fileNames[[4]] <> ".png"];  
img5 = Import[fileNames[[5]] <> ".png"];  
img6 = Import[fileNames[[6]] <> ".png"];  
img7 = Import[fileNames[[7]] <> ".png"];  
img8 = Import[fileNames[[8]] <> ".png"];  
img9 = Import[fileNames[[9]] <> ".png"];  
img10 = Import[fileNames[[10]] <> ".png"];  
img11 = Import[fileNames[[11]] <> ".png"];  
img12 = Import[fileNames[[12]] <> ".png"];  
img13 = Import[fileNames[[13]] <> ".png"];  
img14 = Import[fileNames[[14]] <> ".png"];  
img15 = Import[fileNames[[15]] <> ".png"];  
img16 = Import[fileNames[[16]] <> ".png"];  
img17 = Import[fileNames[[17]] <> ".png"];  
img18 = Import[fileNames[[18]] <> ".png"];  
img19 = Import[fileNames[[19]] <> ".png"];  
img20 = Import[fileNames[[20]] <> ".png"];  
img21 = Import[fileNames[[21]] <> ".png"];  
img22 = Import[fileNames[[22]] <> ".png"];  
img23 = Import[fileNames[[23]] <> ".png"];  
img24 = Import[fileNames[[24]] <> ".png"];  
img25 = Import[fileNames[[25]] <> ".png"];  
img26 = Import[fileNames[[26]] <> ".png"];
```

```

(*)
Export["D2x003x01.tif",img1,ImageResolution->300];
Export["D2x003x02.tif",img2,ImageResolution->300];
Export["D2x003x03.tif",img3,ImageResolution->300];
Export["D2x003x04.tif",img4,ImageResolution->300];
Export["D2x003x05.tif",img5,ImageResolution->300];
Export["D2x003x06.tif",img6,ImageResolution->300];
Export["D2x003x07.tif",img7,ImageResolution->300];
Export["D2x003x08.tif",img8,ImageResolution->300];
Export["D2x003x09.tif",img9,ImageResolution->300];
Export["D2x003x10.tif",img10,ImageResolution->300];
Export["D2x003x11.tif",img11,ImageResolution->300];
Export["D2x003x12.tif",img12,ImageResolution->300];
Export["D2x003x13.tif",img13,ImageResolution->300];
Export["D2x003x14.tif",img14,ImageResolution->300];
Export["D2x003x15.tif",img15,ImageResolution->300];
Export["D2x003x16.tif",img16,ImageResolution->300];
Export["D2x003x17.tif",img17,ImageResolution->300];
Export["D2x003x18.tif",img18,ImageResolution->300];
Export["D2x003x19.tif",img19,ImageResolution->300];
Export["D2x003x20.tif",img20,ImageResolution->300];
Export["D2x003x21.tif",img21,ImageResolution->300];
Export["D2x003x22.tif",img22,ImageResolution->300];
Export["D2x003x23.tif",img23,ImageResolution->300];
Export["D2x003x24.tif",img24,ImageResolution->300];
Export["D2x003x25.tif",img25,ImageResolution->300];
Export["D2x003x26.tif",img26,ImageResolution->300];
*)

```
