# Supplementary material for: Machine Learning Application to Brain Diseases Detection
Source: Preprints.org preprint supplement (doi:10.20944/preprints202311.1127.v1), 2023-11-17
Supplement: Supplementary file 7 [file supplementary]

```
In[1]:= mainDir = SetDirectory[NotebookDirectory[]];
```

```
In[2]:= Clear[fileNames, dataImg]  
fileNames = StringTake[FileNames["*.png"], {1, -5}]  
iMax = Length[fileNames]
```

```
Out[3]= {01-IMG-0007-00026, 02-IMG-0002-00001}
```

```
Out[4]= 2
```

```

In[5]:= i = 1;
dataImg0 = Round[Import[fileNames[[i]] <> ".png", "Data"]];
minmax = MinMax[dataImg0];
img0 = Import[fileNames[[i]] <> ".png"];
Union[Flatten[Flatten[dataImg0]]]
Dimensions[%]
img1 = Image[dataImg0 / minmax[[2]]]

```

```

Out[9]= {0, 550, 1101, 1652, 2202, 2753, 3304, 3855, 4405, 4956, 5507, 6057, 6608, 7159, 7710, 8260,
8811, 9362, 9912, 10463, 11014, 11565, 12115, 12666, 13217, 13767, 14318, 14869,
15420, 15970, 16521, 17072, 17622, 18173, 18724, 19275, 19825, 20376, 20927, 21477,
22028, 22579, 23130, 23680, 24231, 24782, 25332, 25883, 26434, 26985, 27535, 28086,
28637, 29187, 29738, 30289, 30840, 31390, 31941, 32492, 33042, 33593, 34144, 34695,
35245, 35796, 36347, 36897, 37448, 37999, 38550, 39100, 39651, 40202, 40752, 41303,
41854, 42405, 42955, 43506, 44057, 44607, 45158, 45709, 46260, 46810, 47361,
47912, 48462, 49013, 49564, 50115, 50665, 51216, 51767, 52317, 52868, 53419,
53970, 54520, 55071, 55622, 56172, 56723, 57274, 57825, 58375, 58926, 59477,
60027, 60578, 61129, 61680, 62230, 62781, 63332, 63882, 64433, 64984, 65535}

```

```

Out[10]=
{120}

```

```

Out[11]=

```

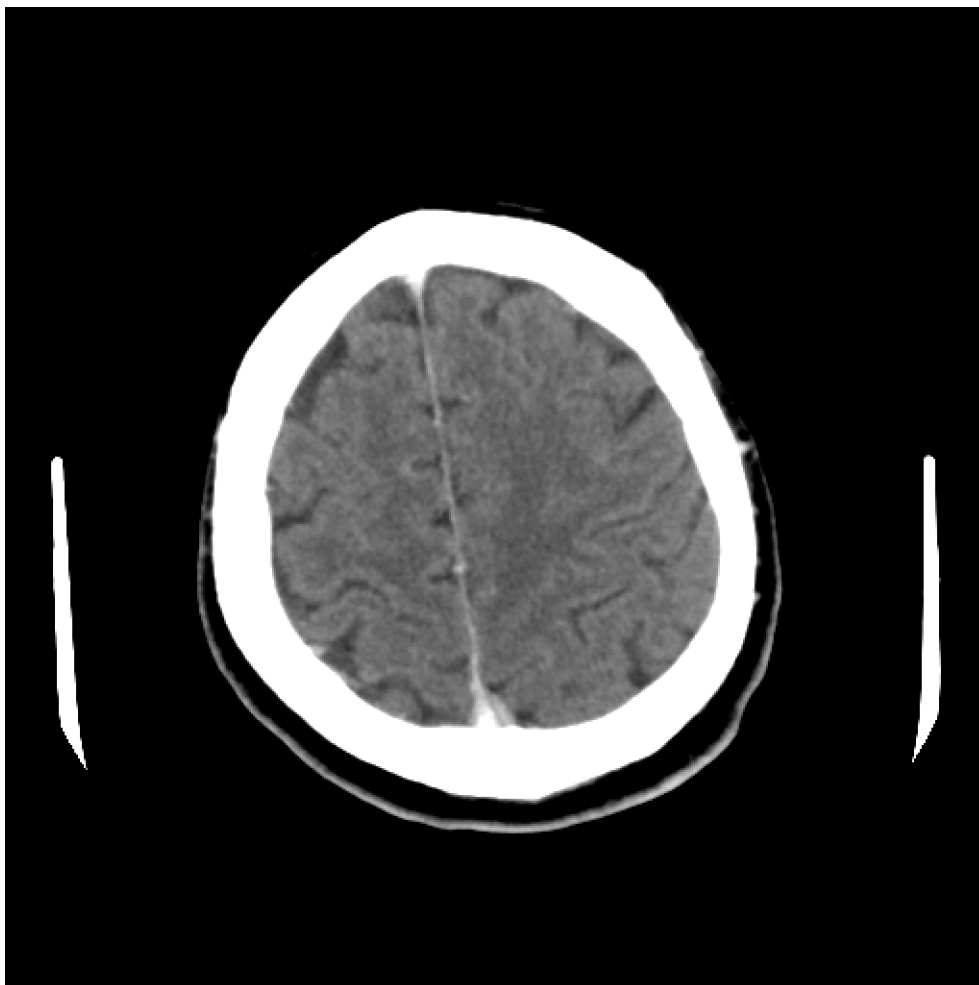

```
In[12]:= img2 = ImageAdjust[img1]  
Out[12]=
```

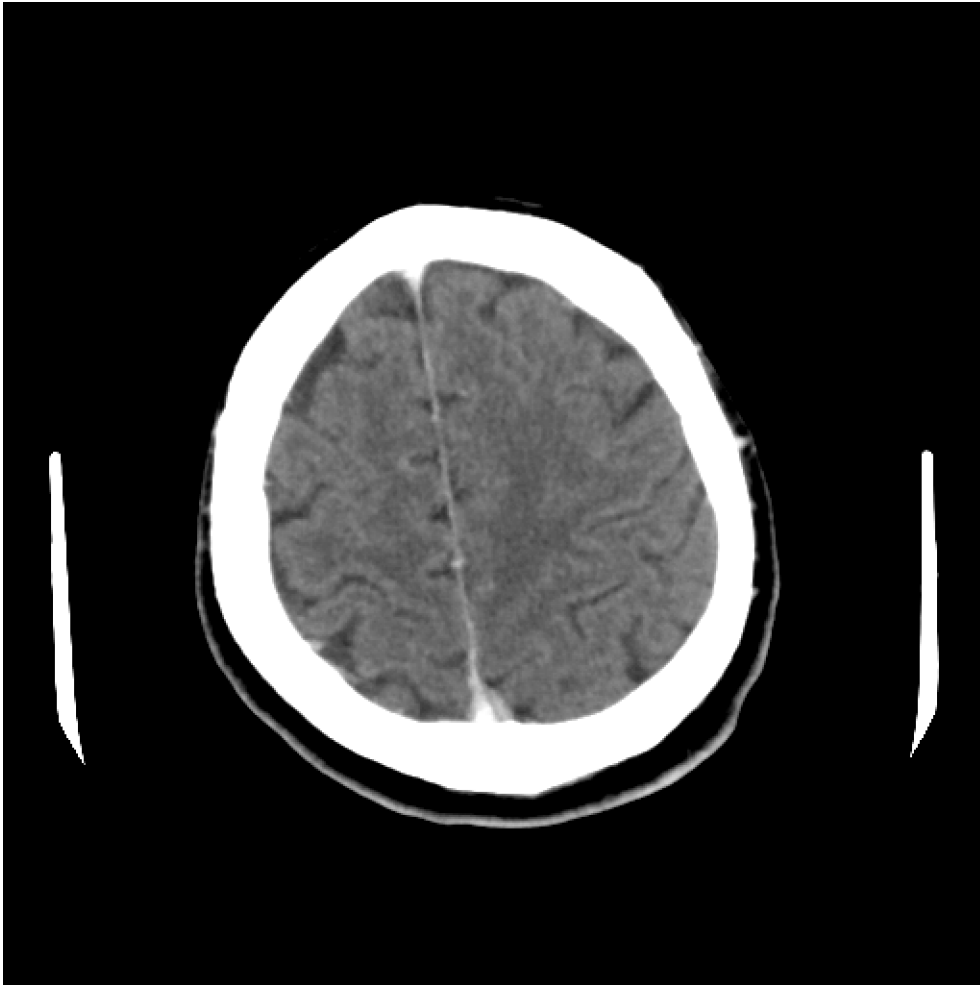

```

In[13]:= i = 1;
n0 = 20;
norm = 1.6;
dataImg0 = Round[Import[fileNames[[i]] <> ".png", "Data"]];
dataImg = Round[Import[fileNames[[i]] <> ".png", "Data"]];
unionDataImg = Union[Flatten[Flatten[dataImg]]];
nstep = Max[unionDataImg[[2 ;; -1]] - unionDataImg[[1 ;; -2]]];
dataImg = Round[1 / (nstep) * Import[fileNames[[i]] <> ".png", "Data"]];
Union[Flatten[Flatten[dataImg]]];
dataImg02Max = dataImg /. {Min[dataImg] → Max[dataImg]};
dataImg02Max = dataImg02Max /. {Min[dataImg02Max] → Max[dataImg]};
Do[dataImg02Max = dataImg02Max /. {Min[dataImg02Max] → Max[dataImg]}, {ind, 1, n0}];
unionMM = Union[Flatten[Flatten[dataImg02Max]]];
dataImg = (dataImg02Max - unionMM[[1]]) / (unionMM[[-1]] - unionMM[[1]]);
img3 = Image[norm dataImg]

```

Out[27]=

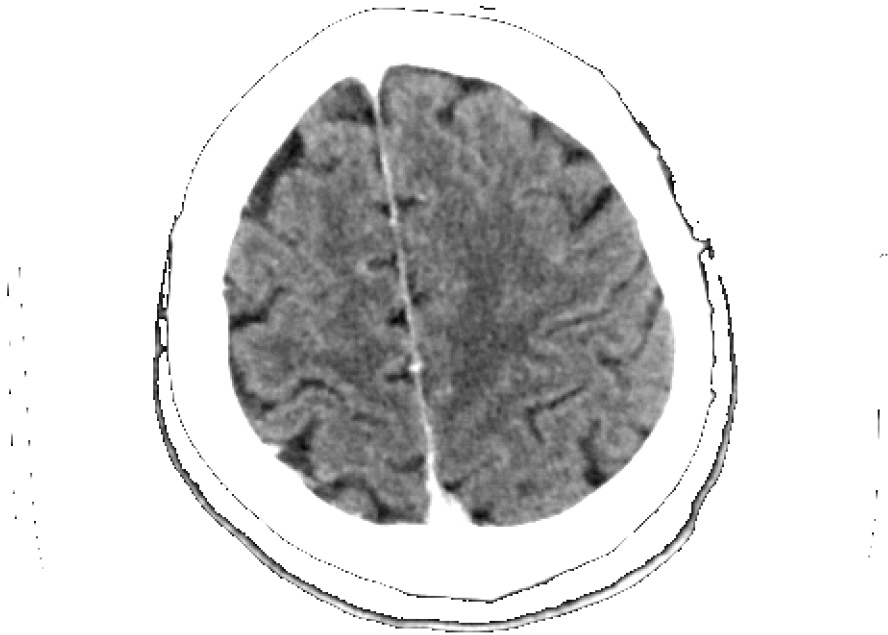

```

In[28]:= (*
Export["D2x007a.tif", img1, ImageResolution→300];
Export["D2x007b.tif", img2, ImageResolution→300];
Export["D2x007c.tif", img3, ImageResolution→300];
*)

```
