# Supplementary material for: Machine Learning Application to Brain Diseases Detection
Source: Preprints.org preprint supplement (doi:10.20944/preprints202311.1127.v1), 2023-11-17
Supplement: Supplementary file 9 [file supplementary]

```
In[61]:= mainDir = SetDirectory[NotebookDirectory[]];  
<< swSVM1101`
```

```
In[63]:= Clear[fileNames, dataImg]  
fileNames = StringTake[FileNames["*.png"], {1, -5}]  
iMax = Length[fileNames]
```

```
Out[64]:= {d2Pacijent10.12}
```

```
Out[65]:= 1
```

```
In[66]:= i = 1; maskIndeks = 1; numberPixelsAverage = 1; imageNorm = 100;  
dataImg = Import[fileNames[[i]] <> ".png", "Data"];
```

```
In[67]:= << swSVM1102`
```

```
In[68]:= fig1 = manipulateHistListPlotFramed
```

```
Out[68]=
```

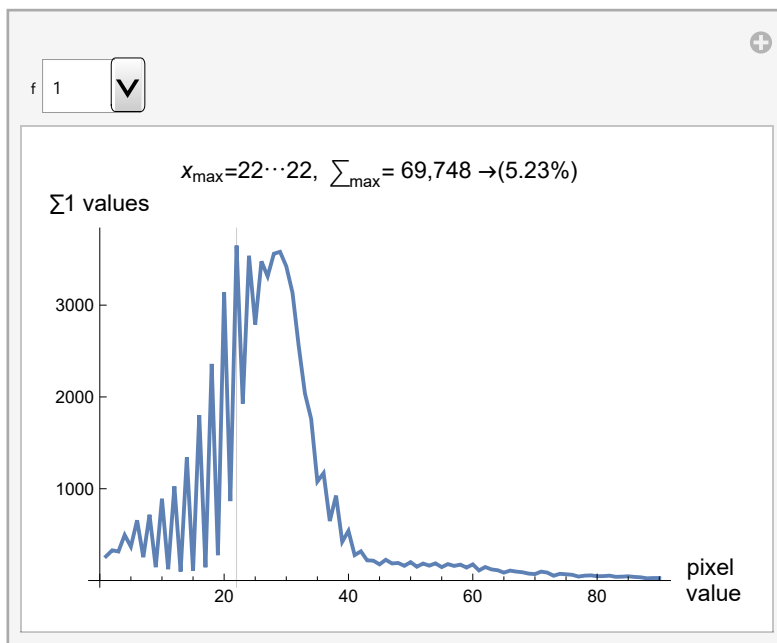

```
In[69]:= fig2 = manipulateHPlotFramed
```

```
Out[69]=
```

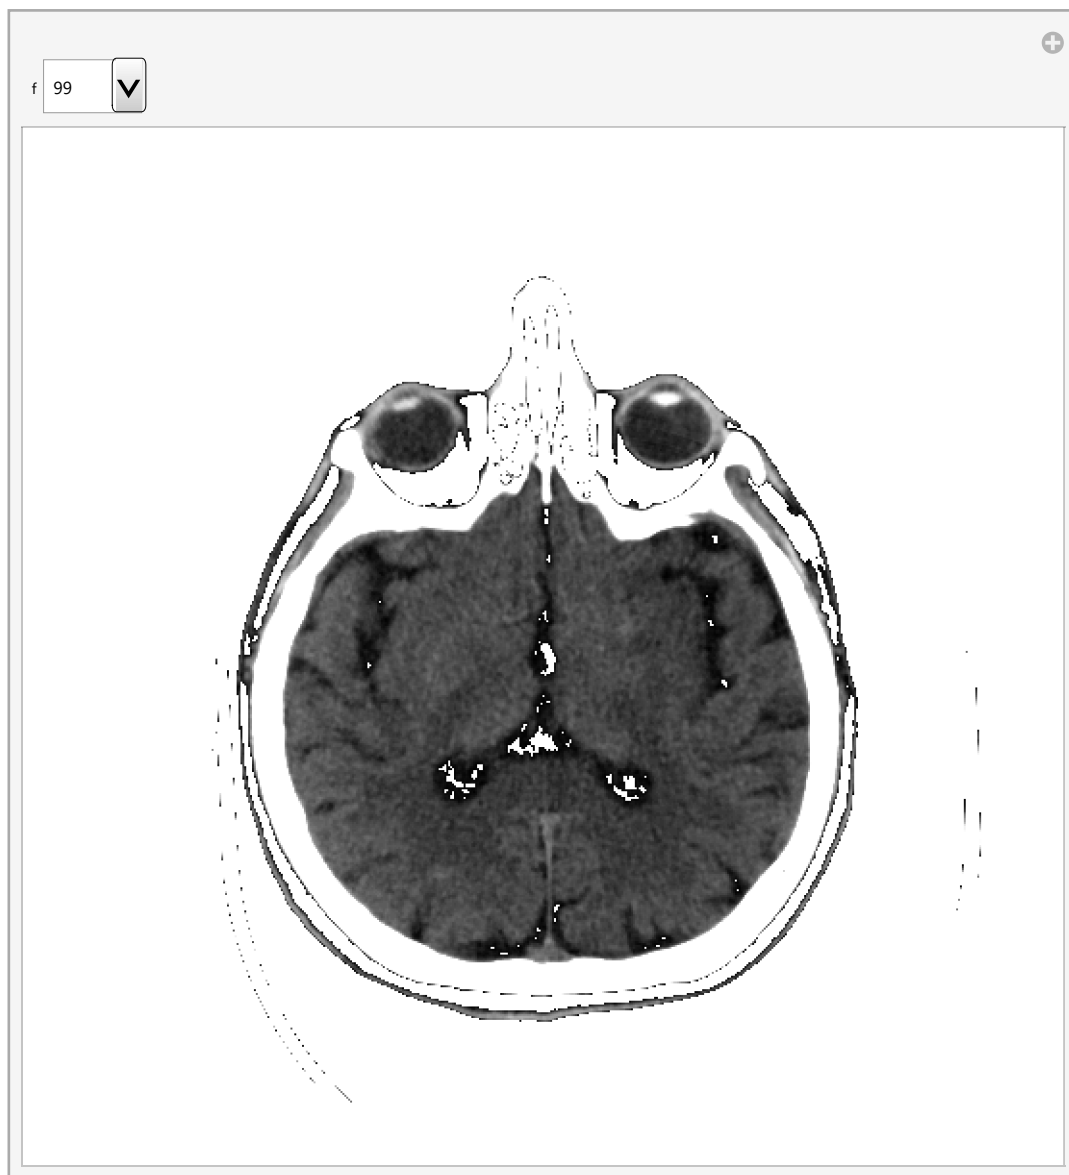

```
In[70]:= (  
  Export["D2x005x1.tif", fig1, ImageResolution -> 300];  
  Export["D2x006x1.tif", fig2, ImageResolution -> 300];  
)
```
