# Supplementary material for: Machine Learning Application to Brain Diseases Detection
Source: Preprints.org preprint supplement (doi:10.20944/preprints202311.1127.v1), 2023-11-17
Supplement: Supplementary file 10 [file supplementary]

```

In[*]:= mainDir = SetDirectory[NotebookDirectory[]];

In[*]:= Clear[fileNames, dataImg]
fileNames = StringTake[FileNames["*.png"], {1, -5}]
iMax = Length[fileNames]

Out[*]=
{ID_000a050f3, ID_000c7ccf6, ID_000ce08f0, ID_00e2fdf54, ID_00e3168a8,
ID_00e4707d1, ID_00e720124, ID_00e88e62f, ID_00e9e5b2a, ID_00eac0e77,
ID_00ebde82e, ID_00ecb125f, ID_00eccf70e, ID_00ecf8f51, ID_b047a7ecc}

Out[*]=
15

In[*]:= img1 = Import[fileNames[[1]] <> ".png"];
img2 = Import[fileNames[[2]] <> ".png"];
img3 = Import[fileNames[[3]] <> ".png"];
img4 = Import[fileNames[[4]] <> ".png"];
img5 = Import[fileNames[[5]] <> ".png"];
img6 = Import[fileNames[[6]] <> ".png"];
img7 = Import[fileNames[[7]] <> ".png"];
img8 = Import[fileNames[[8]] <> ".png"];
img9 = Import[fileNames[[9]] <> ".png"];
img10 = Import[fileNames[[10]] <> ".png"];
img11 = Import[fileNames[[11]] <> ".png"];
img12 = Import[fileNames[[12]] <> ".png"];
img13 = Import[fileNames[[13]] <> ".png"];
img14 = Import[fileNames[[14]] <> ".png"];

(*
Export["D2x004x01.tif",img1,ImageResolution->300];
Export["D2x004x02.tif",img2,ImageResolution->300];
Export["D2x004x03.tif",img3,ImageResolution->300];
Export["D2x004x04.tif",img4,ImageResolution->300];
Export["D2x004x05.tif",img5,ImageResolution->300];
Export["D2x004x06.tif",img6,ImageResolution->300];
Export["D2x004x07.tif",img7,ImageResolution->300];
Export["D2x004x08.tif",img8,ImageResolution->300];
Export["D2x004x09.tif",img9,ImageResolution->300];
Export["D2x004x10.tif",img10,ImageResolution->300];
Export["D2x004x11.tif",img11,ImageResolution->300];
Export["D2x004x12.tif",img12,ImageResolution->300];
Export["D2x004x13.tif",img13,ImageResolution->300];
Export["D2x004x14.tif",img14,ImageResolution->300];
*)

```
